# Evaluating the risk of mosquito-borne diseases in non-endemic regions: A dynamic modeling approach

Nico Stollenwerk<sup>1</sup>, Luís Mateus<sup>1,2</sup>, Vanessa Steindorf<sup>1</sup>,  
Bruno V. Guerrero<sup>1</sup>, Rubén Blasco-Aguado<sup>1,3</sup>, Aitor Cevidades<sup>4</sup>,  
Joseba Bidaurrazaga Van-Dierdonck<sup>5</sup> and Maíra Aguiar<sup>1,6</sup>

<sup>1</sup>Basque Center for Applied Mathematics (BCAM), Bilbao, Spain

<sup>2</sup>Center for Mathematical Studies (CEMS.UL) - Faculty of Sciences  
of the University of Lisbon (FCUL), Lisbon, Portugal

<sup>3</sup>Scuola Superiore Meridionale (SSM), Naples, Italy

<sup>4</sup>Animal Health Department, NEIKER - Basque Institute for Agricultural  
Research and Development, Basque Research and Technology Alliance (BRTA),  
Derio, Bizkaia, Spain

<sup>5</sup>Public Health, Basque Health Department,  
Rekalde Zumarkalea 39A, 48008 Bilbao, Spain

<sup>6</sup>Ikerbasque, Basque Foundation for Science, Bilbao, Spain

October 9, 2024

## Abstract

1  
2  
3  
4  
5  
6  
7  
8  
9  
10  
11

Mosquito-borne diseases are spreading into temperate zones, raising concerns about local outbreaks driven by imported cases. Using stochastic methods, we developed a vector-host model to estimate the risk of import-driven autochthonous outbreaks in non-endemic regions. The model explores key factors such as imported cases and vector abundance. Our analysis shows that mosquito population abundance significantly affects the probability and timing of outbreaks. Even with moderate mosquito populations, isolated or clustered outbreaks can be triggered, highlighting the importance of monitoring vector abundance for effective public health planning and interventions.

## 12 **1 Introduction**

13 The presence of *Aedes* mosquitoes in non-endemic regions has become a  
14 significant public health concern [1, 2], as these areas now face the potential  
15 risk of local transmission of mosquito-borne diseases such as dengue fever,  
16 Zika virus disease, and chikungunya fever [3]. Historically confined to tropical  
17 and subtropical climates, these diseases are now spreading into temperate  
18 zones, driven by factors like climate change, increased global travel, and the  
19 adaptability of these mosquitoes [4], which are now distributed across several  
20 parts of the world [5].

21 The expansion of mosquito species into new regions creates an alarming  
22 epidemiological situation, referred to as an “invasion scenario of disease  
23 introduction”. This scenario represents an increased risk of mosquito-borne  
24 disease cases transmitted by newly established mosquito species that serve  
25 as disease vectors, going beyond a small local outbreak or merely reaching  
26 a threshold for continuous transmission. Such a situation presents new  
27 challenges for public health systems in non-endemic areas, which may not be  
28 adequately equipped to manage these emerging disease outbreaks.

29 Understanding the concept of invasion scenarios of disease introduction  
30 is crucial for assessing the risk of autochthonous (locally transmitted) disease  
31 outbreaks in non-endemic regions [6, 7, 8, 9]. Even when a region is below  
32 the epidemiological threshold - indicating that the disease is not yet self-  
33 sustaining - significant outbreaks of autochthonous cases can still occur.  
34 Important examples include the Madeira Island outbreak in Portugal in 2012  
35 [10] and more recent cases in France and Italy [11].

36 In these invasion scenarios, the risk of autochthonous cases is closely linked  
37 to both the abundance of mosquito vectors and the influx of viremic imported  
38 cases - individuals who are infected returning from travels in endemic areas  
39 who are capable of transmitting the virus [12, 13, 14, 15]. As mosquito  
40 populations increase, the likelihood of disease outbreaks also rises, often  
41 following power-law scaling in the distribution of confirmed cases [16, 17, 18].  
42 This pattern, characteristic of systems approaching a critical threshold,  
43 indicates that small changes in key factors like mosquito population density  
44 or environmental conditions can lead to disproportionately large effects [19].  
45 Recognizing this is essential for public health, emphasizing the need for early  
46 intervention, mosquito control, and continuous surveillance to prevent the  
47 system from reaching a tipping point where large-scale outbreaks become  
48 inevitable.

49 In the epidemiology of mosquito-borne diseases, classical compartmental  
50 models, both with and without explicit mosquito dynamics, have been

51 extensively used, primarily focusing on disease transmission in endemic  
52 regions [20, 21, 22, 23, 24]. These models provide essential parameters for  
53 understanding disease dynamics. However, assessing the potential impact of  
54 mosquito abundance and imported cases on invasion scenarios - where no  
55 autochthonous cases have yet occurred - presents additional challenges, such  
56 as data limitations, dynamic variability, and the stochastic nature of disease  
57 spread.

58 To evaluate and quantify the risk of imported driven autochthonous  
59 cases in non-endemic regions, we propose a dynamic modeling approach that  
60 incorporates factors such as the presence of *Aedes* mosquitoes and viremic  
61 imported cases. Using stochastic methods and their deterministic counterpart,  
62 this paper offers a comprehensive analysis of the risk landscape, including  
63 estimates of waiting times until the first autochthonous case is identified  
64 and statistics on the inter-event times of imported cases, with confidence  
65 intervals derived from likelihood functions. Using the Basque Country as a  
66 case study - where mosquito populations are established and imported cases  
67 are frequently reported - we analyze trends in imported cases and assess  
68 the impact of mosquito abundance on the risk of autochthonous disease  
69 outbreaks. Our study provides a timely framework for predicting imported  
70 driven autochthonous disease cases based on available data on mosquito  
71 presence and imported case notifications, which is crucial for preventing  
72 sustained transmission and mitigating the effects of isolated outbreaks in  
73 non-endemic regions.

## 74 **2 The SIRUV modeling framework**

75 To assess the risk of mosquito-borne disease transmission in non-endemic  
76 regions, we refined and extended the SIRUV modeling framework [25, 26].  
77 Initially designed as a foundational model for simulating disease spread in  
78 endemic areas, the framework is adjusted to describe local transmission  
79 dynamics in non-endemic regions, potentially triggered by the introduction  
80 of viremic imported cases and the presence of competent mosquito vectors.

81 In this section, we start by outlining the structure and key assumptions  
82 of the deterministic SIRUV model, which captures the interaction between  
83 human and mosquito populations in an endemic scenario. Using parameters  
84 obtained from data from endemic countries [27, 28, 29], the model is then  
85 extended to incorporate imported cases - which have little impact on sustained  
86 transmission in endemic areas - lower vector abundance, and stochastic  
87 elements. This extension allows for a more comprehensive analysis of how

88 these factors influence the probability of autochthonous disease outbreaks in  
89 non-endemic regions.

## 90 2.1 The SIRUV model for endemic areas

91 The classical Susceptible-Infected-Recovered (SIR) model [30, 24], which  
92 describes the dynamics of a host-host transmission disease, is given by

$$\begin{aligned}\frac{d}{dt}S &= \alpha R - \frac{\beta_{SIR}}{N}SI \\ \frac{d}{dt}I &= \frac{\beta_{SIR}}{N}SI - \gamma I \\ \frac{d}{dt}R &= \gamma I - \alpha R \quad ,\end{aligned}\tag{1}$$

93 where  $\beta_{SIR}$  represents the transmission rate,  $\gamma$  the recovery rate,  $N$  the  
94 human population size and  $\alpha$  the waning immunity rate. These equations  
95 describe the flow of individuals between the compartments:  $S$  (susceptible),  
96  $I$  (infected), and  $R$  (recovered).

97 To model mosquito-borne diseases, the SIR model is extended to include  
98 explicit vector dynamics [31, 32, 25, 26, 33, 34, 35]. In its basic concept  
99 to describe different mosquito-borne diseases such as dengue, Zika and  
100 chikungunya, this results in the SIRUV type model, which incorporates  
101 compartments for Uninfected mosquitoes  $U$ , and infected mosquitoes, i.e.,  
102 the disease-Vector  $V$ . The equations for the SIRUV model are given by

$$\begin{aligned}\frac{d}{dt}S &= \alpha R - \frac{\beta}{mN}SV \\ \frac{d}{dt}I &= \frac{\beta}{mN}SV - \gamma I \\ \frac{d}{dt}R &= \gamma I - \alpha R \\ \frac{d}{dt}U &= \psi - \frac{\vartheta}{N}UI - \nu U \\ \frac{d}{dt}V &= \frac{\vartheta}{N}UI - \nu V \quad ,\end{aligned}\tag{2}$$

103 where  $\psi = \nu \cdot mN$  represents the mosquito supply rate, with  $m$  being the  
104 ratio of the mosquito population size to the human population size  $N$ ,  $\nu$  the  
105 natural mosquito mortality rate, and  $\beta$  and  $\vartheta$  the transmission rates from  
106 mosquitoes to humans and humans to mosquitoes, respectively.

107 It is important to note that the average lifespan of an *Aedes* mosquito in  
108 nature is two weeks [36], whereas the protection conferred by human immuno-  
109 logical responses persists for a much longer period. In the case of dengue  
110 fever, for example, protection against reinfection can last from 6 months  
111 to 2 years [28, 37, 38, 39, 40]. Given these differing timescales, a simplified  
112 model can be derived by using techniques such as singular perturbation or  
113 center manifold analysis [29, 26, 25] to describe time scale separation. As  
114 described in those studies, the mosquito dynamics are dominated by the  
115 slower dynamics of human infection on immunological time scales.

116 To rescale the mosquito parameters  $\nu$  and  $\vartheta$  to align with the human  
117 immunological timescales, we introduce a parameter  $\epsilon$ , which represents the  
118 ratio between the fast mosquito timescale and the slow human timescale.  
119 This rescaling is done such that  $\epsilon\nu = \hat{\nu} \approx \alpha$  and  $\epsilon\vartheta = \hat{\vartheta}$ . Hence, the last  
120 equation of system (2) becomes

$$\frac{d}{dt}V = \frac{1}{\epsilon} \left( \frac{\hat{\vartheta}}{N}UI - \hat{\nu}V \right) . \quad (3)$$

121 In the limit as  $\epsilon \rightarrow 0$ , indicating that mosquito dynamics quickly reach a  
122 quasi-stationary state, the equation simplifies to

$$\epsilon \frac{d}{dt}V \rightarrow 0 = \frac{\hat{\vartheta}}{N}(M - V)I - \hat{\nu}V . \quad (4)$$

123 When considering the quasi-stationary solution for  $V(I)$  (i.e.,  $\frac{dV}{dt} \approx 0$ ), the  
124 number of infected mosquitoes  $V$  can be expressed as

$$V(I) = \frac{\frac{\vartheta}{\nu} \frac{I}{N}}{1 + \frac{\vartheta}{\nu} \frac{I}{N}} mN, \quad (5)$$

125 where  $M(t) := U(t) + V(t)$  represents the total mosquito population, which  
126 quickly approaches  $M^* = mN$ . This result captures how the number of  
127 infected mosquitoes adjusts according to the infection dynamics within the  
128 human population.

129 When the infected population is much smaller compared to the total  
130 population size  $N$ , as is the case for typical SIR systems in endemic areas,  
131 we have,  $\frac{\vartheta}{\nu} \frac{I}{N} \ll 1$ , which simplifies equation (5) to

$$V(I) = \frac{\vartheta}{\nu} \frac{I}{N} mN . \quad (6)$$

132 For more detailed calculations, see [29].

133 This simplified expression can be substituted for  $V$  in the human infection  
134 dynamics equations of system (2). Consequently, we obtain an effective SIR  
135 system with human-to-human transmission mediated by mosquitoes, given  
136 by

$$\begin{aligned}\frac{d}{dt}S &= \alpha R - \frac{\beta_{\nu}^{\vartheta}}{N}SI \\ \frac{d}{dt}I &= \frac{\beta_{\nu}^{\vartheta}}{N}SI - \gamma I \\ \frac{d}{dt}R &= \gamma I - \alpha R \quad .\end{aligned}\tag{7}$$

137 This relationship between models allows us to infer the basic infection  
138 parameters for mosquito-borne diseases from the host-host dynamic model  
139 given in system (1). Consequently, the infection rates from the SIRUV model  
140 and the effective SIR model are related by

$$\beta_{SIR} = \beta \frac{\vartheta}{\nu} \quad .\tag{8}$$

141 The parameter values used for our numerical simulations are listed in Table 1.  
142 Considering both primary and secondary infections, such as those observed  
143 in dengue, we set an approximate period of 10 years for the waning immunity  
144  $\alpha$ . The effective infectivity rate  $\beta_{SIR}$  is estimated from results in endemic  
145 regions, known to range from approximately  $1.1 \cdot \gamma$  in low endemic areas to  
146  $2 \cdot \gamma$  in high endemic areas [27]. The selected value in our simulations reflects  
147 an effective infectivity rate, and it should be adjusted according to specific  
148 epidemiological information for the mosquito-borne disease and region under  
149 consideration. Any change in these values will be mentioned in the figure  
150 captions.

## 151 2.2 The SIRUV model for an invasion scenario

152 To model an invasion scenario of disease introduction, we consider an area  
153 where there is no sustained local transmission, but where mosquitoes are  
154 present - which are significantly less abundant than in endemic areas - and  
155 imported cases are frequently recorded.

156 To quantify this relative reduction in the mosquito abundance, we intro-  
157 duce the ratio  $k \in [0, 1)$ , defined as

$$k = \frac{\text{vector abundance in the non-endemic area}}{\text{vector abundance in a typical endemic area}} \quad .\tag{9}$$

| Parameter     | Description                                 | Value ( $y^{-1}$ ) |
|---------------|---------------------------------------------|--------------------|
| $\gamma$      | Recovery rate (1 week)                      | 52                 |
| $\alpha$      | Waning immunity rate (10 years)             | 0.1                |
| $\beta$       | Transmission rate from mosquitoes to humans | $1.2 \gamma$       |
| $\vartheta$   | Transmission rate from humans to mosquitoes | $1.2 \nu$          |
| $\nu$         | Mosquito mortality rate (10 days)           | 36.5               |
| $\beta_{SIR}$ | Effective transmission rate                 | $1.2^2 \gamma$     |

Table 1: Baseline model parameters to describe mosquito-borne disease transmission dynamics in endemic regions [27, 26]. These parameters can be refined according to specific epidemiological data from endemic areas and diseases.

158 Since monitoring adult mosquitoes and effectively measuring their contribu-  
 159 tion to the infection process is challenging, the relative mosquito abundance  
 160  $k$ , could be measured using surrogate data such as ovitrap egg counts, posi-  
 161 tive ovitrap index, vector indices, composite index, passive larval and pupal  
 162 collections, adult collections, and *Stegomyia* indices, for example [41, 42, 43].

163 The reduced supply rate of vectors  $\psi$ , in a non-endemic area can be  
 164 expressed as a function of  $k$

$$\psi(k) = k \nu m N \quad , \quad (10)$$

165 where  $k = 1$  represents the vector supply rate typical of an endemic scenario.

166 On the other hand, the possibility of having imported infections  $Y$  into  
 167 the population can be introduced in the model by assuming that there exists  
 168 a steady input of new infections at constant ratio  $\varrho$  [28, 44]. In real life,  
 169 those infections account for travelers arriving during their viremic period or  
 170 residents returning from endemic regions with an active infection, which are  
 171 often recorded in non-endemic areas when those individuals seek medical  
 172 care. The number of imported cases is described by  $Y := \varrho N$ , with  $\varrho > 0$ ,  
 173 and it is included in the infection term of the uninfected mosquitoes equation.

174 After including these considerations in the System (2), the model for the

175 non-endemic area reads

$$\begin{aligned}
 \frac{d}{dt}S &= \alpha R - \frac{\beta}{mN}SV \\
 \frac{d}{dt}I &= \frac{\beta}{mN}SV - \gamma I \\
 \frac{d}{dt}R &= \gamma I - \alpha R \\
 \frac{d}{dt}U &= \psi(k) - \frac{\vartheta}{N}U(I + \varrho N) - \nu U \\
 \frac{d}{dt}V &= \frac{\vartheta}{N}U(I + \varrho N) - \nu V \quad .
 \end{aligned} \tag{11}$$

176 In this deterministic model, the expected number of imported cases is constant  
 177 at  $\varrho N$ , which is relatively small compared to the total human population size  
 178 (usually on the order of a few individuals). However, because infectious disease  
 179 transmission is inherently stochastic, this variability must be considered in  
 180 the modeling process.

### 181 2.3 The stochastic SIRUV model for an invasion scenario

182 The stochastic version of the SIRUV model given in system (11) is described  
 183 by the dynamics of the discrete state vector  $\underline{X} := (S, I, R, U, V)^{tr}$ , repre-  
 184 senting the evolution of the state variables of the model. The probability of  
 185 arriving to the state  $\underline{X}$  at time  $t$  is modeled as a continuous time Markov  
 186 process with the following master equation

$$\frac{d}{dt} p(\underline{X}, t) = \sum_{j=1}^n \left( w_j(\underline{X} + \Delta \underline{X}_j) \cdot p(\underline{X} + \Delta \underline{X}_j, t) - w_j(\underline{X}) \cdot p(\underline{X}, t) \right) \quad , \tag{12}$$

187 where  $n = 7$  is the number of different deviations from state  $\underline{X}$ , which are  
 188 given by  $\Delta \underline{X}_j := \underline{r}_j$ . For the SIRUV model for the non-endemic scenario,  
 189 the transitions  $w_j(\underline{X})$  and their shift vectors  $\underline{r}_j$  are

$$\begin{aligned}
 w_1(\underline{X}) &= \alpha R & , & \quad \underline{r}_1 = (-1, 0, 1, 0, 0)^{tr} \\
 w_2(\underline{X}) &= \frac{\beta}{mN}SV & , & \quad \underline{r}_2 = (1, -1, 0, 0, 0)^{tr} \\
 w_3(\underline{X}) &= \gamma I & , & \quad \underline{r}_3 = (0, 1, -1, 0, 0)^{tr} \\
 w_4(\underline{X}) &= \psi(k) & , & \quad \underline{r}_4 = (0, 0, 0, -1, 0)^{tr} \\
 w_5(\underline{X}) &= \frac{\vartheta}{N}U(I + \varrho N) & , & \quad \underline{r}_5 = (0, 0, 0, 1, -1)^{tr} \\
 w_6(\underline{X}) &= \nu U & , & \quad \underline{r}_6 = (0, 0, 0, 1, 0)^{tr} \\
 w_7(\underline{X}) &= \nu V & , & \quad \underline{r}_7 = (0, 0, 0, 0, 1)^{tr} \quad .
 \end{aligned} \tag{13}$$



190 With these  $w_j(\underline{X})$  and  $r_j$  specified, we can obtain stochastic realizations of  
191 the process using the Gillespie algorithm [45].

192 In the case of a well-defined system size, we can express the stochastic  
193 process in terms of the densities of the state variables. From this, we  
194 can obtain the mean field ODE system and, using the Kramers-Moyal  
195 approximation of the master equation, derive a Fokker-Planck equation and  
196 from it a system of stochastic differential equations [46]. In this study, we  
197 investigate stochastic processes with small numbers of cases, which are close  
198 to extinction thresholds. Therefore, we will primarily use the version with  
199 absolute numbers, rather than the densities.

200 The expected number of autochthonous infected cases is denoted by  $\langle I \rangle$   
201 and is defined as

$$\langle I \rangle := \sum_{\underline{X}} I p(\underline{X}, t) = \langle I(t) \rangle \quad , \quad (14)$$

202 where  $p(\underline{X}, t)$  represents the probability of the system being in state  $\underline{X}$  at  
203 time  $t$ . The dynamics of  $\langle I \rangle$  is governed by the evolution of these probabilities  
204 over time.

205 After performing the calculations, we obtain the following differential  
206 equation for the expected number of autochthonous infected cases

$$\frac{d}{dt} \langle I \rangle = \sum_{\underline{X}} I \frac{d}{dt} p(\underline{X}, t) = \frac{\beta}{mN} \langle SV \rangle - \gamma \langle I \rangle \quad . \quad (15)$$

207 In the mean field approximation, this simplifies to

$$\frac{d}{dt} \langle I \rangle = \frac{\beta}{mN} \langle S \rangle \langle V \rangle - \gamma \langle I \rangle \quad . \quad (16)$$

208 Thus, the ordinary differential equation (ODE) system captures the dynamics  
209 of the stochastic process in terms of expectation values [19].

## 210 **2.4 Analytic results for the expected risk of autochthonous** 211 **cases**

212 After defining the SIRUV model for non-endemic areas and accounting for  
213 the stochastic nature of the process, we found that the expected number  
214 of autochthonous infected cases  $\langle I \rangle$ , depends on the number of imported  
215 cases  $Y = \varrho N$ , and the relative mosquito abundance  $k$ . We use the mean  
216 value of the quasi-stationary solution for  $I$  as a proxy to estimate the risk of  
217 autochthonous cases of arbovirus diseases in non-endemic regions.

218 From the invasion scenario model (see system (11)), which serves as a  
 219 mean field approximation of the stochastic process, we derive an analytical  
 220 expression for  $\langle I \rangle$ . For simplicity in notation, we will omit the expectation  
 221 brackets in the following discussion.

222 Starting from the mosquito dynamics given by the last two equations in  
 223 system (11), the dynamics of the total mosquito population  $M = U + V$ , is

$$\frac{d}{dt}M = \nu kmN - \nu M \quad . \quad (17)$$

224 At stationarity, the total mosquito population is  $M^* = kmN$ , and the  
 225 uninfected mosquito population is  $U = M^* - V = kmN - V$ .

226 Assuming the time scale separation ( $\frac{dV}{dt} \approx 0$ ) described in Section 2.1,  
 227 the following expression for  $V(I)$  can be derived from the last equation in  
 228 system (11)

$$V(I) = \frac{\frac{\vartheta}{\nu} \frac{I + \varrho N}{N}}{1 + \frac{\vartheta}{\nu} \frac{I + \varrho N}{N}} kmN \quad . \quad (18)$$

229 The assumption that  $\frac{\vartheta}{\nu} \frac{I + \varrho N}{N} \ll 1$  remains valid since the number of infected  
 230 and imported cases is small compared to the total population. Consequently,  
 231 the relationship between infected mosquitoes and infected humans is approx-  
 232 imately linear and given by

$$V(I) = \frac{\vartheta}{\nu} \frac{I + \varrho N}{N} kmN \quad . \quad (19)$$

233 This expression can be substituted for  $V$  in the human disease dynamics  
 234 equation in system (11)

$$\frac{d}{dt}I = \frac{\beta}{mN} SV(I) - \gamma I \quad . \quad (20)$$

235 Considering that in a non-endemic area almost the entire population is  
 236 susceptible, hence  $S(t) \approx S_0 \approx N$ , the equation can be written as

$$\frac{d}{dt}I = (k\beta_{eff} - \gamma)I + k\beta_{eff}\varrho N \quad , \quad (21)$$

237 where  $\beta_{eff} := \beta \frac{\vartheta}{\nu} \frac{S_0}{N} \approx \beta_{SIR}$  is the effective infection rate. Note that in the  
 238 invasion scenario  $k$  can still modulate the infectivity.

239 For  $k\beta_{eff} < \gamma$ , i.e., below the epidemiological threshold for exponential  
 240 growth upon index cases ( $\beta_{eff} = \gamma$ ), we have, triggered by import, a sub-  
 241 critical stationary state of the dynamics given by Equation (21)

$$I^* = k\beta_{eff} \frac{1}{\gamma - k\beta_{eff}} \varrho N \quad , \quad (22)$$

242 where  $\gamma - k\beta_{eff} =: \varepsilon(k)$  is defined as the distance away from the exponential  
243 growth threshold with self-sustained spreading in the local population, de-  
244 pending on the relative mosquito abundance  $k$ . Hence, the expected number  
245 of autochthonous cases, given the underlying stochastic process is

$$\langle I \rangle^*(k, \varrho) = k \beta_{eff} \frac{1}{\varepsilon(k)} \varrho N \quad . \quad (23)$$

246 This expression depends on the mosquito abundance  $k$ , in the invasion region  
247 and the import of infection  $\varrho$ . Although  $\langle I \rangle$  is typically much smaller than  
248 one case, stochastic simulations can reveal isolated autochthonous cases and  
249 occasionally rare clusters of outbreaks, where more than one case occurs  
250 simultaneously, as illustrated in Figure 1.

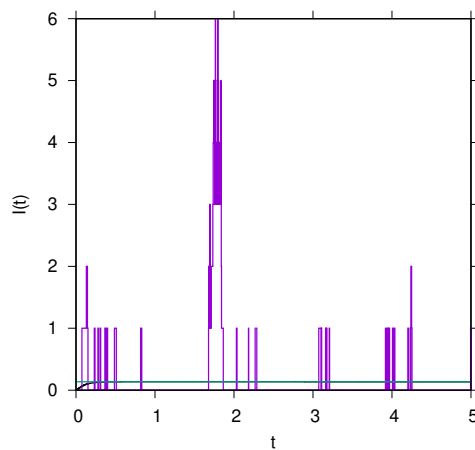

Figure 1: One stochastic realization (in magenta), the trajectory towards the stationary state of the SIRUV model (in black), and the approximation solution using the equation (in green) with  $k = 40\%$  as the proportion of mosquitoes relative to endemic countries. For  $N = 10^4$  and  $\varrho = 10^{-5}$ , the parameter values used in this simulation are listed in Table 1.

251 **2.5 The SIRUV model with explicit dynamics for imported**  
 252 **cases  $Y$**

253 Aimed at understanding the impact of imported cases on the dynamics  
 254 of stochastic realizations, we extend the SIRUV framework by explicitly  
 255 incorporating the dynamics of imported cases  $Y$ , to study their stochastic  
 256 fluctuations.

257 The SIRUVY model can be expressed as

$$\begin{aligned}
 \frac{d}{dt}S &= \alpha R - \frac{\beta}{mN}SV \\
 \frac{d}{dt}I &= \frac{\beta}{mN}SV - \gamma I \\
 \frac{d}{dt}R &= \gamma I - \alpha R \\
 \frac{d}{dt}U &= \psi(k) - \frac{\vartheta}{N}U(I + Y) - \nu U \\
 \frac{d}{dt}V &= \frac{\vartheta}{N}U(I + Y) - \nu V \\
 \frac{d}{dt}Y &= \tilde{\varrho}N - \gamma Y \quad ,
 \end{aligned}
 \tag{24}$$

258 where  $\tilde{\varrho}$  represents the constant input rate of imported cases, which can  
 259 recover at rate  $\gamma$ . Note that the last equation is decoupled from System (24),  
 260 and consequently, the stationary value of the imported cases  $Y^*$ , is given by

$$Y^* = \frac{\tilde{\varrho}}{\gamma}N = \varrho N \quad ,
 \tag{25}$$

261 consistent with the previous model in System (11).

262 When considering the cumulative imported cases  $C_Y$ , over a given time  
 263 interval, we have

$$\frac{d}{dt}C_Y = \tilde{\varrho}N \quad .
 \tag{26}$$

264 The numerical solutions for both the number of imported cases  $Y(t)$ , and the  
 265 cumulative imported cases  $C_Y(t)$ , are illustrated in Figure 2. With initial  
 266 conditions set to zero imported cases  $Y(t_0) = 0$ , we observe that the mean  
 267 field solution of the system described by Equation (24) converges quickly to  
 268 its stationary state, as shown in Figure 2(a). After five years of simulation,  
 269 the cumulative number of imported cases is expected to be approximately  
 270 26 cases, see Figure 2(b).

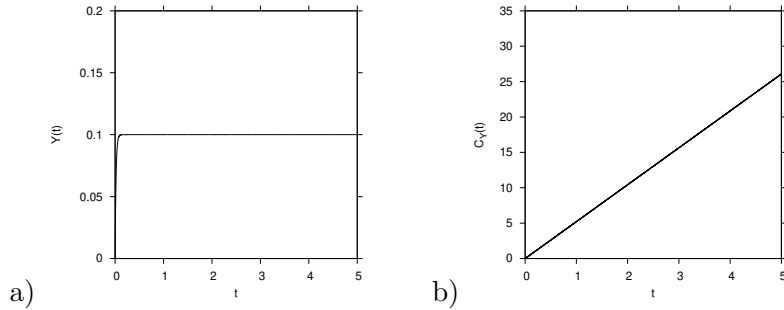

Figure 2: Expected values from the mean field solution over a 5-year simulation period. For  $N = 10^4$  and  $\varrho = 10^{-5}$ , the parameter values used in this simulation are listed in Table 1. In (a), the imported cases and in (b), the cumulative cases  $C_Y(t)$ .

## 2.6 The stochastic SIRUVY model

Following the stochastic approach described in Section 2.3, we model the SIRUVY system using the master equation (see equation (12)). The stochastic model is characterized by the extended state vector  $\underline{X} := (S, I, R, U, V, Y)^{tr}$  and includes the following  $n = 9$  transitions, each with its corresponding shift vectors

$$\begin{aligned}
 w_1(\underline{X}) &= \alpha R & , & \quad r_1 = (-1, 0, 1, 0, 0, 0)^{tr} \\
 w_2(\underline{X}) &= \frac{\beta}{mN} SV & , & \quad r_2 = (1, -1, 0, 0, 0, 0)^{tr} \\
 w_3(\underline{X}) &= \gamma I & , & \quad r_3 = (0, 1, -1, 0, 0, 0)^{tr} \\
 w_4(\underline{X}) &= \psi & , & \quad r_4 = (0, 0, 0, -1, 0, 0)^{tr} \\
 w_5(\underline{X}) &= \frac{\varrho}{N} U(I + Y) & , & \quad r_5 = (0, 0, 0, 1, -1, 0)^{tr} \\
 w_6(\underline{X}) &= \nu U & , & \quad r_6 = (0, 0, 0, 1, 0, 0)^{tr} \\
 w_7(\underline{X}) &= \nu V & , & \quad r_7 = (0, 0, 0, 0, 1, 0)^{tr} \\
 w_8(\underline{X}) &= \tilde{\varrho} N & , & \quad r_8 = (0, 0, 0, 0, 0, -1)^{tr} \\
 w_9(\underline{X}) &= \gamma Y & , & \quad r_9 = (0, 0, 0, 0, 0, 1)^{tr} .
 \end{aligned} \tag{27}$$

Similarly to the deterministic approach, the dynamics of imported cases  $Y$ , can be described on its own by the following master equation

$$\frac{d}{dt} p(Y, t) = \tilde{\varrho} N p(Y - 1, t) + \gamma(Y + 1) p(Y + 1, t) - (\tilde{\varrho} N + \gamma Y) p(Y, t) . \tag{28}$$

279 For the cumulative number of imported cases  $C_Y$ , using the entry transitions  
 280 of the stochastic dynamics of  $Y$ , we have the master equation given by

$$\frac{d}{dt} p(C_Y, t) = \tilde{\varrho}N p(C_Y - 1, t) - \tilde{\varrho}N p(C_Y, t) \quad . \quad (29)$$

281 This represents a simple Poisson process with a known distribution in time  
 282 evolution [47, 19].

283 The analytical solution to the master equation (29), given the initial  
 284 condition  $C_Y(t_0)$  at time  $t_0$ , is described by the conditional probability

$$p(C_Y, t | C_Y(t_0), t_0) = \frac{(\lambda(t - t_0))^{C_Y - C_Y(t_0)}}{(C_Y - C_Y(t_0))!} e^{-\lambda(t - t_0)} \quad , \quad (30)$$

285 where  $\lambda := \tilde{\varrho}N = \varrho\gamma N$  is constant. This represents a Poisson distribution  
 286 for each time point  $t$ .

287 Figure 3(a) illustrates the differences between the mean field approxi-  
 288 mation and a stochastic realization for imported cases. We observe that,  
 289 in contrast to the mean field approximation (in black), where the solution  
 290 converges to a constant infected population, on average less than one infected  
 291 case, the stochastic realization of imported cases (in magenta) can exhibit  
 292 time intervals with no cases and others with multiple cases. This pattern is  
 293 also observed in the cumulative imported cases, as shown in Figure 3(b).

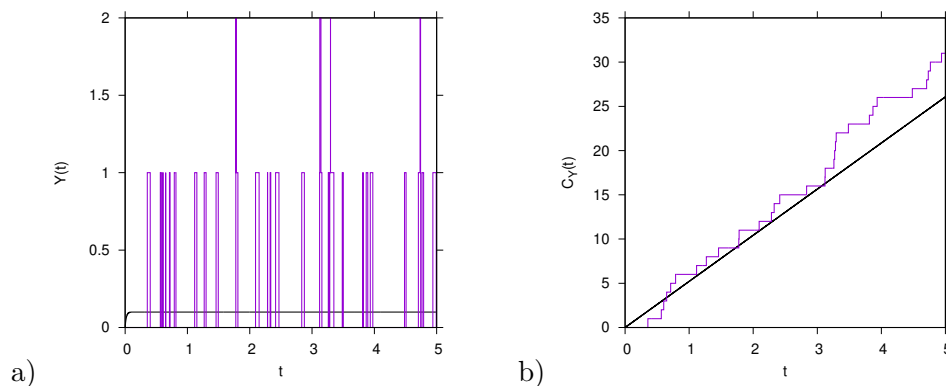

Figure 3: One stochastic realization (in magenta) and the mean field solution (in black) of (a) imported cases  $Y(t)$ , and (b) cumulative imported cases  $C_Y(t)$ . For  $N = 10^4$  and  $\varrho = 10^{-5}$ , the parameter values used in this simulation are listed in Table 1.

294 Motivated by stochastic modeling, we apply statistical methods to model  
 295 imported cases and integrate these models with our risk estimator. Let  $\tau$

296 denote the waiting time between two consecutive imported cases,  $C_Y(t_{n-1})$   
297 to  $C_Y(t_n)$ . The probability distribution of  $\tau$  is given by

$$p(\tau) = \lambda e^{-\lambda\tau} \quad , \quad (31)$$

298 where  $\lambda := \varrho\gamma N$  is the rate parameter. This distribution allows us to analyze  
299 the statistical characteristics of imported case notifications based on the  
300 waiting times between their occurrences.

### 301 **2.6.1 Parameter estimation from waiting time distribution**

302 Given the recorded imported cases and the time intervals between consecutive  
303 cases, represented as the data vector  $\underline{\tau} = (\tau_1, \tau_2, \dots, \tau_n)$ , we estimate the  
304 parameter  $\lambda$  using the log-likelihood method.

305 The likelihood function for the waiting times is given by

$$p(\tau_1, \tau_2, \dots, \tau_n) = \prod_{i=1}^n \lambda e^{-\lambda\tau_i} = L(\lambda) \quad , \quad (32)$$

306 where the log-likelihood function is maximized to determine the maximum  
307 likelihood estimator

$$\hat{\lambda} = \frac{1}{\frac{1}{n} \sum_{i=1}^n \tau_i} \quad . \quad (33)$$

308 From the given data, we order the waiting times to produce the observed  
309 distribution function (shown in magenta in Figure 4). This is then compared  
310 to the cumulative distribution function

$$P(\tau) := \int_0^{\tau} p(\tilde{\tau}) d\tilde{\tau} = 1 - e^{-\lambda\tau} \quad , \quad (34)$$

311 using both the known parameter  $\lambda = \varrho\gamma N$  (represented by the black line  
312 in Figure 4) and the maximum likelihood estimator  $\hat{\lambda}$  (middle green line in  
313 Figure 4).

314 We then quantify the confidence interval of the estimation, acknowledging  
315 that simulated data may deviate from the true parameters. Once the best  
316 estimate of  $\lambda$ ,  $\hat{\lambda}$ , is determined, the expected number of imported cases can  
317 be expressed as

$$\langle Y^* \rangle = \frac{\hat{\lambda}}{\gamma} \quad . \quad (35)$$

318 Although the risk estimator refers to average values, the model accounts for  
319 the intrinsic stochasticity of the time series.

## 320 2.6.2 Confidence intervals from the likelihood function

321 Using the negative inverse Fisher matrix, which simplifies to a  $1 \times 1$  matrix in  
322 the case of a single parameter, we can approximate the variance of a Gaussian  
323 distribution by examining the curvature of the log-likelihood function around  
324 its maximum. This variance is given by

$$\sigma^2 = -\frac{1}{\frac{d^2}{d\lambda^2} \ln L \Big|_{\lambda=\hat{\lambda}}} . \quad (36)$$

325 For the exponential waiting time likelihood

$$L(\lambda) = p(\underline{\tau} | \lambda) = \lambda^n e^{-\lambda \sum_{i=1}^n \tau_i} , \quad (37)$$

326 the variance simplifies to

$$\sigma^2 = \frac{\hat{\lambda}^2}{n} , \quad (38)$$

327 where  $n$  is the number of data points. This provides a  $2\sigma$  confidence interval,  
328 which approximately covers 95% of the Gaussian distribution

$$\lambda = \hat{\lambda} \pm 2\sigma , \quad (39)$$

329 as shown in Figure 4).

330 The estimate of  $\lambda$  can be applied to the cumulative distribution function  
331  $P(\tau)$ . In Figure 4,  $P(\tau_i)$  is obtained by ordering the  $\tau_i$  values from smallest  
332 to largest (x-axis) and plotting  $\frac{i}{n}$  on the y-axis (in magenta), where the  $\tau_i$   
333 values are derived from simulations with  $\lambda = \varrho\gamma N$ . The figure also includes  
334 the maximum likelihood estimate  $P(\tau) = 1 - e^{-\hat{\lambda}\tau}$  (middle green line) along  
335 with its 95% confidence intervals (upper and lower green lines). Additionally,  
336 the theoretical cumulative distribution function  $P(\tau) = 1 - e^{-\varrho\gamma N\tau}$  is shown  
337 (black line).

338 For a more thorough analysis of estimation uncertainties, Bayesian meth-  
339 ods using conjugate priors, such as a Gamma distribution for the exponential  
340 case, could be used. The Bayesian posterior  $p(\lambda | \underline{\tau})$  may provide asymmetric  
341 confidence intervals. For further details on these methods, see [47], as well as  
342 Appendices A and B for a more in-depth discussion in the present context.

343 Note that the current analysis of inter-event times is preliminary, provid-  
344 ing a basic guide for stochastic simulations. As more data become available,  
345 the analysis can be refined and more sophisticated statistical methods can  
346 be applied.



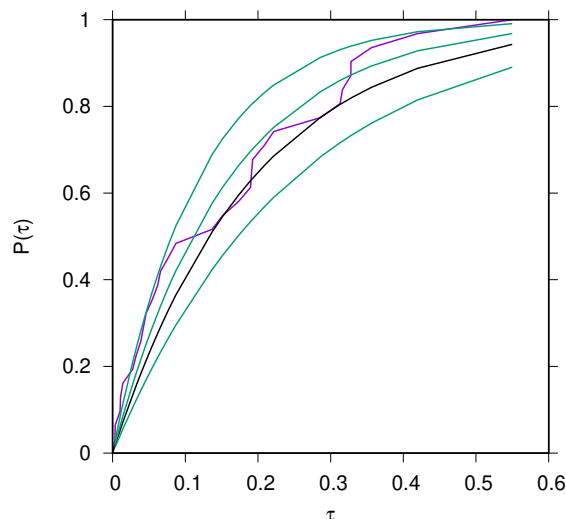

Figure 4: The empirical cumulative distribution function is shown in magenta, while the maximum likelihood estimate and its 95% confidence intervals are represented by the green lines. The theoretical cumulative distribution, represented by a black line, is known in simulations but not in empirical data analysis. The numerical values are  $\hat{\lambda} = 6.276 \text{y}^{-1}$  and  $\varrho\gamma N = 5.214 \text{y}^{-1}$ .

347 **2.6.3 Derivation of the maxima likelihood estimate variance and**  
 348 **theoretical background**

349 For large data sets, the likelihood function approximates a Gaussian dis-  
 350 tribution around the maximum log-likelihood estimator. Specifically, the  
 351 likelihood function  $L(\lambda)$  can be approximated by a Gaussian distribution  
 352  $p_G(\lambda)$ , given by

$$L(\lambda) \sim \frac{1}{\sigma\sqrt{2\pi}} e^{-\frac{(\lambda-\hat{\lambda})^2}{2\sigma^2}} =: p_G(\lambda) \quad , \quad (40)$$

353 where  $\hat{\lambda}$  is the mean value and  $\sigma^2$  is the variance, determined by the curvature  
 354 of the log-likelihood function around the maximum. This curvature is  
 355 quantified by the second derivative of the log-likelihood function at the  
 356 maximum, expressed as

$$\left. \frac{d^2}{d\lambda^2} \ln L \right|_{\lambda=\hat{\lambda}} \quad . \quad (41)$$

357 For the Gaussian approximation, the variance is

$$\sigma^2 = -\frac{1}{\frac{d^2}{d\lambda^2} \ln L \Big|_{\lambda=\hat{\lambda}}} . \quad (42)$$

358 Applying this to the likelihood function of the exponential distribution

$$L(\lambda) = \lambda^n e^{-\lambda \sum_{i=1}^n \tau_i} , \quad (43)$$

359 we obtain

$$\frac{d^2}{d\lambda^2} \ln L \Big|_{\lambda=\hat{\lambda}} = \frac{d^2}{d\lambda^2} \left( n \ln(\lambda) - \lambda \sum_{i=1}^n \tau_i \right) \Big|_{\lambda=\hat{\lambda}} = -\frac{n}{\hat{\lambda}^2} . \quad (44)$$

360 Thus, the variance is

$$\sigma^2 = -\frac{1}{\frac{d^2}{d\lambda^2} \ln L \Big|_{\lambda=\hat{\lambda}}} = \frac{\hat{\lambda}^2}{n} . \quad (45)$$

361 The standard deviation is  $\sigma = \frac{\hat{\lambda}}{\sqrt{n}}$ , which can be used to determine the confi-  
362 dence interval for  $\lambda$  as  $\lambda = \hat{\lambda} \pm 2\sigma$ . While this approach is practically useful,  
363 a more fundamental description and justification is provided in Appendix B  
364 through the Cramér-Rao consideration, which offers only an inequality as a  
365 lower bound for Equation (45).

### 366 **3 Mosquito abundance and its impact on disease** 367 **transmission**

368 Analyzing mosquito abundance is crucial for predicting the transmission  
369 of mosquito-borne diseases, but it presents significant challenges. To ad-  
370 dress these complexities, a practical approach is to establish a threshold for  
371 mosquito abundance. Below this threshold, the likelihood of local disease  
372 transmission is minimal, while exceeding it significantly increases the risk of  
373 autochthonous cases.

#### 374 **3.1 Explicit calculation of Poisson process approximation for** 375 **autochthonous cases**

376 To model the dynamics of autochthonous infected cases, we start with the  
377 differential equation

$$\frac{d}{dt} I = k\beta \frac{\vartheta S_0}{\nu N} (I + \varrho N) - \gamma I , \quad (46)$$

378 where  $I^* = k \cdot \beta \frac{\vartheta}{\nu} \frac{1}{\varepsilon} \cdot \varrho N$ , see Equation (23), and  $\varepsilon \rightarrow \gamma$ . For small  $k$ , the  
 379 equilibrium value  $I^*$  approaches zero, simplifying the dynamics.

380 The cumulative number of autochthonous cases  $C_I$  then follows

$$\frac{d}{dt} C_I = k \beta \frac{\vartheta}{\nu} \frac{S_0}{N} \varrho N =: \lambda_I \quad , \quad (47)$$

381 where  $\lambda_I$  represents the rate of new autochthonous cases.

382 Thus, the stochastic process for  $C_I$  can be approximated by a Poisson  
 383 process. The master equation for  $p(C_I, t)$  is

$$\frac{d}{dt} p(C_I, t) = \lambda_I p(C_I - 1, t) - \lambda_I p(C_I, t) \quad , \quad (48)$$

384 which has the Poisson distribution solution

$$p(C_I, t \mid C_I(t_0) = 0, t_0) = \frac{(\lambda_I(t - t_0))^{C_I}}{C_I!} e^{-\lambda_I(t - t_0)} \quad , \quad (49)$$

385 Where  $C_I(t_0) = 0$  and  $T = t - t_0$  represents the time interval, similar to the  
 386 analysis of imported cases, denoted by  $C_Y$ .

387 The probability of having no autochthonous cases is

$$p(C_I = 0, T) = e^{-\lambda_I T} = e^{-k \beta \frac{\vartheta}{\nu} \frac{S_0}{N} \varrho N T} \quad , \quad (50)$$

388 which approaches 1 as  $k$  becomes small.

389 The probability of having one or more autochthonous cases is

$$p(C_I \geq 1, T) = 1 - p(C_I = 0, T) = 1 - e^{-k \beta \frac{\vartheta}{\nu} \frac{S_0}{N} \varrho N T} =: p_{th} \quad , \quad (51)$$

390 where  $p_{th}$  is a threshold probability. Solving for  $k$  yields

$$k_{th} = \frac{-\ln(1 - p_{th})}{\beta \frac{\vartheta}{\nu} \frac{S_0}{N} \cdot \varrho N \cdot T} \quad , \quad (52)$$

391 which gives the mosquito abundance  $k_{th}$  needed to achieve a certain proba-  
 392 bility  $p_{th}$  of having one or more autochthonous cases. This can be used for  
 393 different values of  $p_{th}$ , such as  $p_{th} = \frac{9}{10}$  or  $p_{th} = \frac{1}{10}$ , in subsequent analyses.

### 394 **3.2 Analysing the mosquito abundance threshold**

395 In this section, we analyze the bounds for relative mosquito abundance  
 396 based on theoretical scenarios. We assume  $S_0 = N$ ,  $\varrho = 10^{-5}$ ,  $N = 10^4$ ,

397 and  $Y^* = 0.1$ . The threshold values for mosquito abundance  $k$ , for a given  
 398 probability  $p_{th}$  are determined using Equation (52).

399 The relationship between imported cases and local transmission, empha-  
 400 sizing the role of mosquito abundance in determining the probability and  
 401 timing of autochthonous cases, is illustrated in Figure 5. In a real-world  
 402 scenario, this is evident in the comparison between the Basque Country,  
 403 which has reported zero non-travel-related cases so far, and Italy, which had  
 404 over 80 cases notified in 2023 [11], highlighting the different risks potentially  
 405 associated with varying mosquito densities and environmental conditions.

406 Considering a probability threshold of  $p_{th} = \frac{1}{10}$ , which means that in 1  
 407 out of 10 stochastic runs we expect at least one autochthonous case within  
 408 the time interval  $T = 1$  year, we obtain

$$k_{th} = \frac{-\ln(1 - p_{th})}{\beta \frac{\vartheta}{\nu} \frac{S_0}{N} \cdot \varrho N \cdot T} = 0.01403 \approx 1.4\% \quad . \quad (53)$$

409 For a higher probability threshold of  $p_{th} = \frac{9}{10}$ , the value of  $k_{th}$  is approxi-  
 410 mately 31%. This indicates that we would nearly always observe at least one  
 411 case in stochastic simulations within the first year.

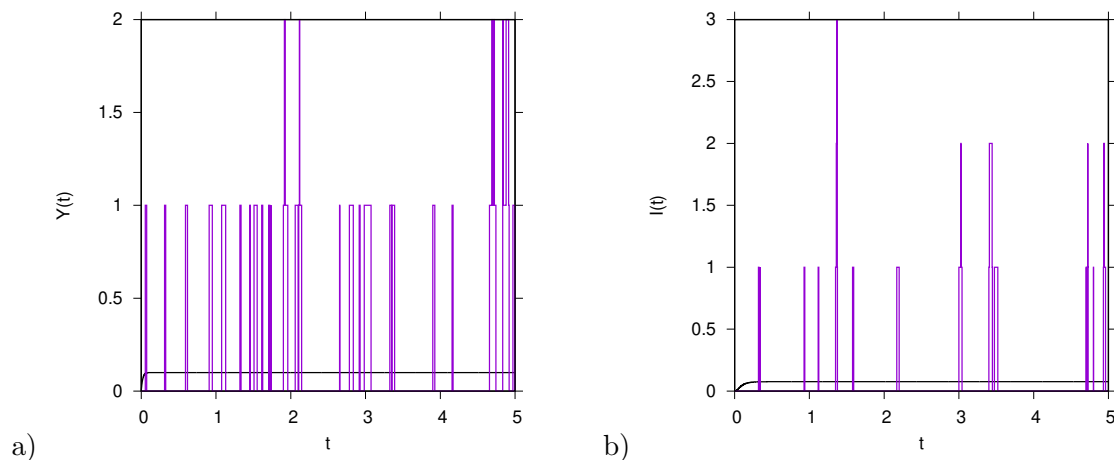

Figure 5: For mosquito abundance  $k = 30\%$ ,  $\varrho = 10^{-5}$ , and  $N = 10^4$ , in a) imported cases  $Y(t)$  and b) autochthonous cases  $I(t)$ . Stochastic simulation is shown in magenta and its mean-field solution in black.

412 Figure 5 illustrates the relationship between imported cases and local  
 413 transmission, highlighting how mosquito abundance impacts the likelihood  
 414 and timing of autochthonous cases to occur. For a mosquito abundance

415 of  $k = 30\%$ , Figure 5(a) shows the time series of imported cases  $Y(t)$ ,  
416 while Figure 5(b) presents the time series of autochthonous cases  $I(t)$ . Two  
417 autochthonous cases occur in the first year (shown in magenta), but periods  
418 of up to a year with no autochthonous cases also occur, illustrating the  
419 stochastic nature of disease transmission even at relatively high mosquito  
420 abundance.

421 The Poisson distribution for the threshold value  $k_{th} = 0.3067 \approx 30\%$  is  
422 presented in Figure 6, showing the probability of no autochthonous cases  
423 being  $p(C_I = 0, T) = 0.1$  and the probability of one or more cases being  
424  $p_{th} = 0.9$ .

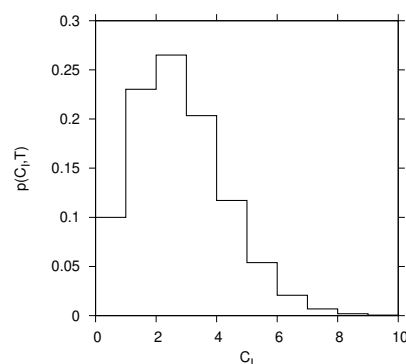

Figure 6: Poisson distribution for  $k_{th} = 0.3067 \approx 30\%$ .

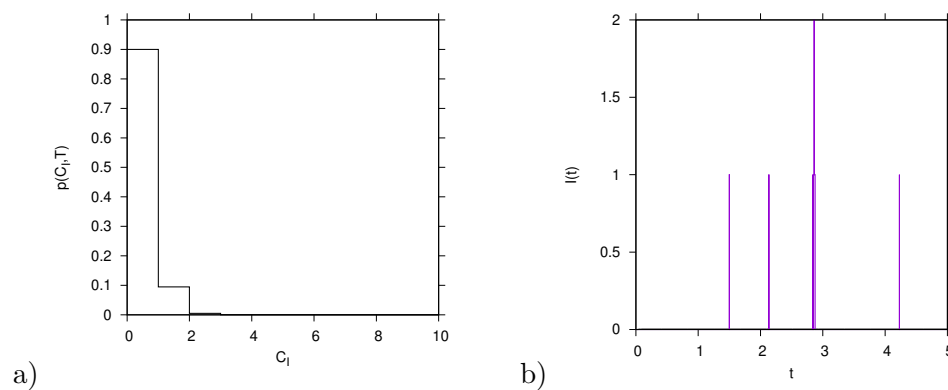

Figure 7: a) Poisson distribution for  $k_{th} = 0.01403 \approx 1.4\%$ . b) Time series of autochthonous cases  $I(t)$ , for a mosquito abundance of  $k = 2\%$ .

425 Conversely, for the threshold value  $k_{th} = 0.01403 \approx 1.4\%$ , Figure 7(a)  
426 demonstrates that the probability of observing zero autochthonous cases is  
427  $p(C_I = 0, T) = 0.9$ , leading to  $p_{th} = 0.1$  for one or more cases. Figure 7(b)  
428 indicates that with this threshold, we nearly always observe no autochthonous  
429 cases within the first year and rarely any cases in subsequent years.

430 While the Poisson process approximation for the autochthonous cases  
431  $I(t)$ , especially for small mosquito abundance  $k$ , provides an indication of  
432 the expected frequency and duration without cases, the full stochastic model  
433 simulations reveal more clustering of cases. For example, Figure 5(b) shows  
434 up to three cases occurring simultaneously, and Figure 7(b) shows two cases  
435 at the same time. This clustering may be influenced by state-dependent  
436 factors in the stochastic variables  $w_j$  that are not captured by the basic  
437 Poisson approximation.

### 438 3.3 Analysis of the distance from exponential growth $\varepsilon(k)$

439 For small mosquito abundance  $k$ , the term  $\varepsilon(k)$ , defined in Section 2.4, can  
440 be approximated by the recovery rate  $\gamma$ . This approximation is illustrated  
441 in Figure 8, where  $k$  values are shown on a logarithmic scale (base 10). For  
442 instance, for  $k = 1\%$ , the approximation  $\varepsilon \approx \gamma$  is already quite accurate,  
443 with  $\gamma \approx 52 \text{ y}^{-1}$ .

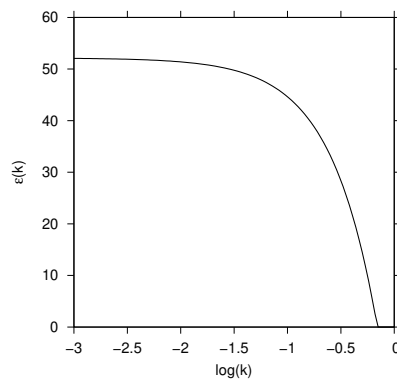

Figure 8: Values of  $\varepsilon(k)$ , the distance to the threshold of exponential growth, converge towards  $\gamma = 52\text{y}^{-1}$  as the relative mosquito abundance  $k$ , decreases.

444 In an invasion scenario with relatively low mosquito abundance and no  
445 observed autochthonous cases, the expected number of autochthonous cases

446  $\langle I \rangle$  can be quantified using the simplified expression

$$\langle I \rangle(k, \varrho) = k \xi \varrho N \quad (54)$$

447 where  $\xi = \frac{\beta}{\gamma} \frac{\vartheta}{\nu} \frac{S_0}{N}$  is constant. For a naive, completely susceptible population,  
448  $\frac{S_0}{N} = 1$ . Thus,  $\xi$  can be compared to the basic reproduction number typically  
449 expected in vector-borne disease models. Consequently, our risk estimator is  
450 given by Equation (54).

451 It is important to note that, due to the presence of several imported cases  
452 over time, we might still expect occasional autochthonous cases, even if they  
453 occur infrequently. Additionally, observed increases in mosquito abundance  
454 over the years [11] could impact this risk.

455 The primary focus of the risk measure is to determine the probability  
456 of observing the first autochthonous case in a non-endemic area. Although  
457 the calculated expectation  $\langle I \rangle$  is well below one (see Figure 1), stochastic  
458 simulations can provide insights into when the first cases might occur, de-  
459 pending on the levels of imported cases and mosquito abundance. We will  
460 analyze scenarios ranging from low to intermediate mosquito abundance and  
461 examine conditions where the approximation  $\varepsilon \approx \gamma$  no longer holds. In such  
462 cases, the non-linearity of  $\varepsilon(k)$  can lead to increasing clusters of outbreaks  
463 until the threshold for exponential growth and self-sustained transmissibility  
464 is reached.

### 465 **3.4 The risk of outbreaks in increasing mosquito abundance** 466 **scenarios**

467 In this section, we analyze scenarios where mosquito abundance increases be-  
468 yond the simplest approximation explored previously. To analyze deviations  
469 from the simplest linear relationship of the expected number of autochthonous  
470 infections  $\langle I \rangle^*$  with respect to mosquito abundance  $k$ , we need to consider  
471 how the effective transmission rate  $\varepsilon(k)$  changes as  $k$  increases.

#### 472 **3.4.1 Deviations from the simplest linear relation of expected** 473 **autochthonous infected on mosquito abundance**

474 The simplest risk estimator for the expected number of autochthonous  
475 infections  $\langle I \rangle^*$  is given by

$$\langle I \rangle^* = k \cdot \beta_{eff} \cdot \frac{1}{\varepsilon} \cdot \varrho N \quad , \quad (55)$$

476 where  $\varepsilon$  is the distance to the threshold of exponential growth and is given  
 477 by

$$\varepsilon(k) = \gamma - k \cdot \beta \frac{\vartheta}{\nu} \cdot \frac{S_0}{N} \quad . \quad (56)$$

478 In the initial phases of outbreaks, where  $S_0 \approx N$ , and as long as  $\varepsilon > 0$ ,  
 479 the expression  $\varepsilon(k) \rightarrow \gamma$  as  $k \rightarrow 0$  indicates that the distance to the threshold  
 480 of exponential growth approaches the recovery rate  $\gamma$ .

481 However, deviations from the simplest linear relationship become signifi-  
 482 cant as mosquito abundance  $k$  approaches the critical threshold  $k_c$ . In this  
 483 regime, the linear approximation of  $\langle I \rangle^* \sim \frac{k}{\varepsilon(k)} \approx \frac{k}{\gamma}$  fails to hold, and the  
 484 expected number of autochthonous cases can increase very rapidly.

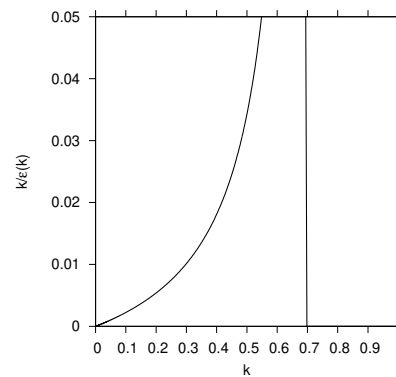

Figure 9: Graphical representation of the expression  $\langle I \rangle^* \sim \frac{k}{\varepsilon(k)}$  as a function of the relative mosquito abundance  $k$  (bent curve). The vertical line represents the critical value  $k_c$ .

485 As shown in Figure 9, the relationship between  $\langle I \rangle^* \sim k/\varepsilon(k)$  and  
 486 mosquito abundance reveals that for small  $k$  the expression  $k/\varepsilon(k)$  approxi-  
 487 mately behaves linearly as  $k/\gamma$ . This is expected since  $\varepsilon(k) \approx \gamma$  for small  
 488 values of  $k$ . Nevertheless, close to the critical threshold  $k_c$  there is a significant  
 489 non-linear growth in  $\langle I \rangle^*$ . As  $k$  approaches  $k_c$ ,  $\varepsilon(k)$  decreases rapidly, causing  
 490  $\langle I \rangle^*$  to rise sharply. This non-linearity is due to the rapid approach of  $\varepsilon(k)$   
 491 towards zero, leading to a divergence in  $\langle I \rangle^*$ . These findings highlight the  
 492 importance of accounting for the non-linearity of  $\varepsilon(k)$  in disease transmission  
 493 models and emphasize the need for careful empirical observation of mosquito  
 494 abundances, as they may increase from year to year.



495 **3.4.2 Temporal dynamics and scaling close to the epidemiological**  
496 **threshold**

497 The dynamics described in Equation (21) for the sub-critical regime reads

$$\frac{d}{dt}I = -(\gamma - k\beta_{eff}) \cdot I + k\beta_{eff} \cdot \varrho N \quad (57)$$

498 and can be solved, yielding its time-dependent solution given by

$$I(t) = I(t_0) \cdot e^{-(\gamma - k\beta_{eff}) \cdot (t - t_0)} + \frac{k\beta_{eff} \cdot \varrho N}{\gamma - k\beta_{eff}} \left(1 - e^{-(\gamma - k\beta_{eff}) \cdot (t - t_0)}\right) \quad (58)$$

499 When the mosquito abundance  $k$  reaches its threshold value  $k_c$ , given by  
500  $\gamma - k_c \cdot \beta_{eff} = 0$ , the time-dependent solution is

$$I(t) = I(t_0) + k\beta_{eff} \cdot \varrho N \cdot (t - t_0) \quad (59)$$

501 i.e. with the distance to threshold  $\varepsilon = \gamma - k\beta_{eff} = 0$ . This implies that  
502 close to the threshold, the total number of infected individuals becomes  
503 asymptotically self-similar, i.e., a homogeneous function of the general form

$$I(t) = t^{\hat{\theta}} \cdot F\left(\varepsilon t^{\frac{1}{\hat{\nu}_{\parallel}}}, \varrho t^{\frac{\hat{\mu}}{\hat{\nu}_{\parallel}}}\right) \quad (60)$$

504 The critical exponents  $\hat{\theta}$ ,  $\hat{\nu}_{\parallel}$ , and  $\hat{\mu}$  characterize the self-similar, scale-invariant  
505 behavior of the infection spread near the critical threshold, governing the  
506 growth, time evolution, and density fluctuations of the infected population  
507 [48].

508 Rescaling in terms of the parameter  $\varepsilon$ , we have

$$I(t) = \varepsilon^{-\hat{\theta}\hat{\nu}_{\parallel}} \cdot F(t\varepsilon^{\hat{\nu}_{\parallel}}, \varrho\varepsilon^{-\hat{\mu}}) \quad (61)$$

509 In the mean-field regime, i.e., no spatial effects, the exponents are  $\hat{\theta} = 0$ ,  
510  $\hat{\nu}_{\parallel} = 1$ , and  $\hat{\mu} = 1$  (see [48] for further details on general scaling theory  
511 around critical thresholds).

512 For empirical epidemiological systems, this results in distributions of  
513 avalanches with power-law tails, leading to larger numbers of autochthonous  
514 cases more frequently than expected, for example, in classical Gaussian  
515 distributions.

516 Thus, from a management point of view, once mosquito abundance  
517 increases and leads to larger clustered outbreaks, even small additional  
518 increases in mosquito numbers will result in significantly larger outbreaks of  
519 autochthonous cases.

## 520 4 Applying the model to Basque Country data

521 The Basque Country is an autonomous region in northern Spain with ap-  
522 proximately 2.2 million inhabitants. In this region, the Public Health Epi-  
523 demiological Unit, in collaboration with NEIKER - the Basque Institute for  
524 Agricultural Research and Development - monitors records of both imported  
525 disease cases and the distribution and establishment of disease vectors. Al-  
526 though the Basque Country is considered a non-endemic area for tropical  
527 mosquito-borne diseases, it has established populations of *Aedes* mosquitoes  
528 (with increasing distribution) and frequently reports viremic imported cases  
529 of dengue, Zika, and Chikungunya. This makes it an ideal setting for this  
530 study.

### 531 4.1 Imported cases of *Aedes* mosquito-borne diseases in the 532 Basque Country in 2019 (Pre-COVID) and 2022 (Post- 533 COVID)

534 The raw empirical data of cumulative imported cases of dengue, Zika and  
535 chikungunya in the Basque Country for the years of 2019 and 2022, provided  
536 by the Health Basque Department, is illustrated in Figure 10.

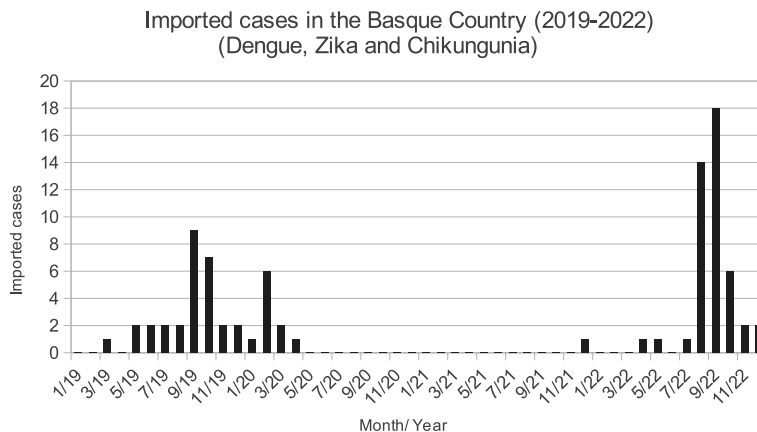

Figure 10: Epidemiological records of imported disease cases in the Basque Country from 2019 to 2022.

537 The data reveals a steady registration of imported cases throughout the  
538 year, with a notable increase during the summer months. This seasonal surge  
539 coincides with the period of peak mosquito activity, which can contribute to

540 higher disease transmission rates. Note that for the years of 2020 and 2021,  
541 very few imported cases were recorded since travel restrictions were in place  
542 due to the COVID-19 pandemic.

#### 543 4.1.1 Estimation of imported cases

544 Applying the statistical analysis described in Section 2.6.2, we obtain the  
545 inter-event cumulative distribution of imported cases, and the cumulative  
546 counts of imported cases of dengue, chikungunya, and Zika, i.e. *Aedes*  
547 mosquito-transmitted diseases notified in the Basque Country for the years  
548 2019. For 2022, there were no significant differences in the number of  
549 imported cases compared to 2019; the numbers remained relatively similar,  
550 although travel activity was higher in the latter half of the year. The primary  
551 difference was the increase in mosquito abundance, as illustrated in Figure  
552 12.

553 For 2019, Figure 11 (a) shows the inter-event cumulative distribution  
554 of imported cases  $P(\tau)$  for dengue, chikungunya, and Zika in the Basque  
555 Country (in blue), alongside the inter-event rate  $\lambda = (0.085 \pm 0.031) \text{ d}^{-1}$  (in  
556 green). Figure 11 (b) shows the cumulative number of imported cases  $C_Y(t)$   
557 for dengue, chikungunya, and Zika (in blue) and the estimated mean number  
558 of cumulative imported cases  $\langle C_Y \rangle = \hat{\lambda}(t - t_0)$  (in green).

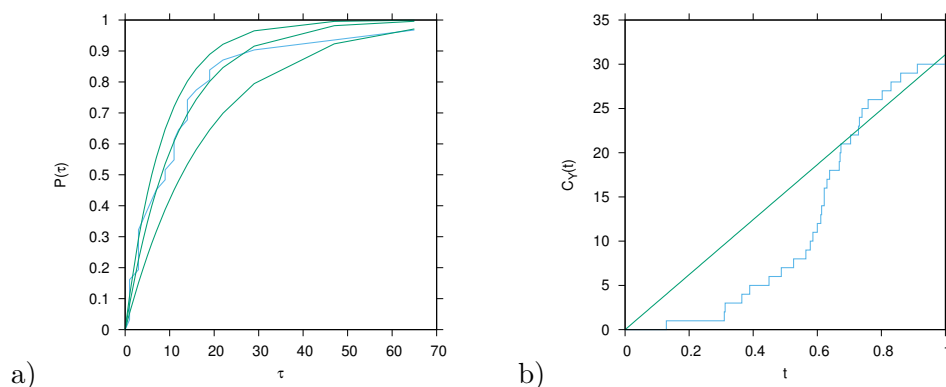

Figure 11: For the year of 2019, in (a) the inter-event cumulative distribution of imported cases  $P(\tau)$  (in blue), alongside the inter-event statistics (in green). In (b) the cumulative number of imported cases  $C_Y(t)$  (in blue), and the estimated mean number of cumulative imported cases  $\langle C_Y \rangle = \hat{\lambda}(t - t_0)$  (in green). The inter-event times  $\tau_i$  include the first and the last day of the year.

559 The estimation of imported cases in the Basque Country is derived from  
560 the data on imported cases using maximum likelihood estimators. The  
561 estimation of the parameter  $\lambda$  is given by Equation (33). The confidence  
562 interval for  $\lambda$  is calculated as  $\sigma = \frac{\hat{\lambda}}{\sqrt{n}}$ . For the Basque Country in 2019, this  
563 yields

$$\lambda = \hat{\lambda} \pm 2\sigma = 0.085 \pm 0.031 \text{ day}^{-1} \quad (62)$$

564 Additionally, data from the post-COVID-19 pandemic period in 2022 provides  
565 an estimated mean number of imported cases

$$\lambda = 0.128 \pm 0.037 \text{ day}^{-1} \quad (63)$$

566 This indicates some increase in the number of imported cases in 2022. Varia-  
567 tions in the risk of autochthonous cases across different years are evident,  
568 with a clear upward trend. Differences in trends may also be observed at  
569 different spatial scales, such as by province, though these differences are gen-  
570 erally not substantial, especially if confidence intervals overlap. Furthermore,  
571 variations over the years show lower risks before August and after September,  
572 with increased risks during the summer months, aligning with the period of  
573 higher mosquito activity.

574 The expected number of imported cases  $\langle Y \rangle^*$  is related to the Poisson  
575 rate  $\lambda$  as follows

$$\langle Y \rangle^* = \varrho N = \frac{\lambda}{\gamma} \quad (64)$$

576 As an example, using the results for 2019 in the Basque Country, where  
577  $\lambda = 0.1$ , we obtain

$$\langle Y \rangle^* = \frac{0.1 \text{ day}^{-1}}{\frac{1}{7 \text{ day}}} = 0.1 \cdot 7 = 0.7 \quad (65)$$

578 This initial statistical analysis provides insights into the trends of imported  
579 cases in the Basque Country, offering preliminary estimates of parameters  
580 critical for assessing the risk of mosquito-borne diseases in the region.

581 To further refine this analysis, a potential improvement would involve  
582 seasonal breakdowns, such as spring, summer, and autumn, to capture  
583 variations in case numbers. However, this approach faces challenges, including  
584 a smaller dataset for each season and the lack of robust patterns due to  
585 significant regional variations. Additionally, the sparse data for 2020 and  
586 2021, due to travel restrictions from the COVID-19 pandemic, limits the  
587 analysis. Future data may reveal a return to more typical patterns and  
588 provide clearer trends.

#### 589 4.1.2 Mosquito abundance data in the Basque Country

590 In the Basque Country, the Basque Institute for Agricultural Research and  
591 Development (NEIKER) has been monitoring mosquito breeding sites and  
592 recording egg count data across various localities for over a decade [49],  
593 providing increasingly detailed insights into mosquito population trends.

594 The data show a significant increase in egg counts from ovitraps in recent  
595 years. Notably, the counts in the most populated traps have reached levels  
596 comparable to those in endemic regions, with maximum counts nearing 1,000  
597 eggs. However, since the ovitraps are not yet standardized across temporal  
598 and spatial scales, comparing mosquito abundance between invasion scenarios  
599 and endemic areas remains challenging.

600 Given the increasing number of traps deployed each season, this analysis  
601 focuses on the sum of the highest 20 egg counts as a preliminary indicator of  
602 mosquito abundance in the Basque Country for 2019 and 2022.

603 Figure 12 shows the 20 highest egg counts in the Basque Country. There  
604 is a noticeable difference between 2019 (pre-COVID-19 pandemic) and 2022  
605 (post-COVID-19 pandemic). In 2022, the maximum egg counts reached 1000  
606 eggs, with a mean of approximately 530, while in 2019, the maximum count  
607 was only a quarter of that, with a mean around 140 eggs.

608 Since no autochthonous cases of *Aedes* mosquito-borne diseases have yet  
609 been detected in the region, these egg counts serve as initial indicators of  
610 mosquito abundance. These results can be applied to calculate the relative  
611 risk of disease transmission, considering the presence of imported cases and  
612 mosquito levels in the Basque Country.

#### 613 4.1.3 Risk of autochthonous cases in the Basque Country

614 The expected risk of autochthonous cases  $\langle I \rangle^*$  is given by

$$\langle I \rangle^* = k \cdot \beta_{eff} \frac{1}{\varepsilon} \cdot \langle Y \rangle^* = f(k, \langle Y \rangle^*), \quad (66)$$

615 and for small mosquito abundance  $k$ , where  $\varepsilon(k) \approx \gamma$ , this simplifies to

$$\langle I \rangle^* = k \cdot \beta_{eff} \frac{1}{\gamma} \cdot \frac{\lambda}{\gamma} = k \cdot \frac{\beta}{\gamma} \frac{\vartheta}{\nu} \cdot \frac{\lambda}{\gamma}. \quad (67)$$

616 Here,  $\frac{\beta}{\gamma} \frac{\vartheta}{\nu} = \xi$  is a factor defined from basic information in endemic countries.

617 As discussed in Section 2, we use  $\frac{\beta}{\gamma} = 1.2$  and  $\frac{\vartheta}{\nu} = 1.2$ , giving  $\frac{\beta}{\gamma} \frac{\vartheta}{\nu} = 1.44 \approx 1.5$ .

618 These values can be adjusted based on updated information for different  
619 vector-borne diseases.

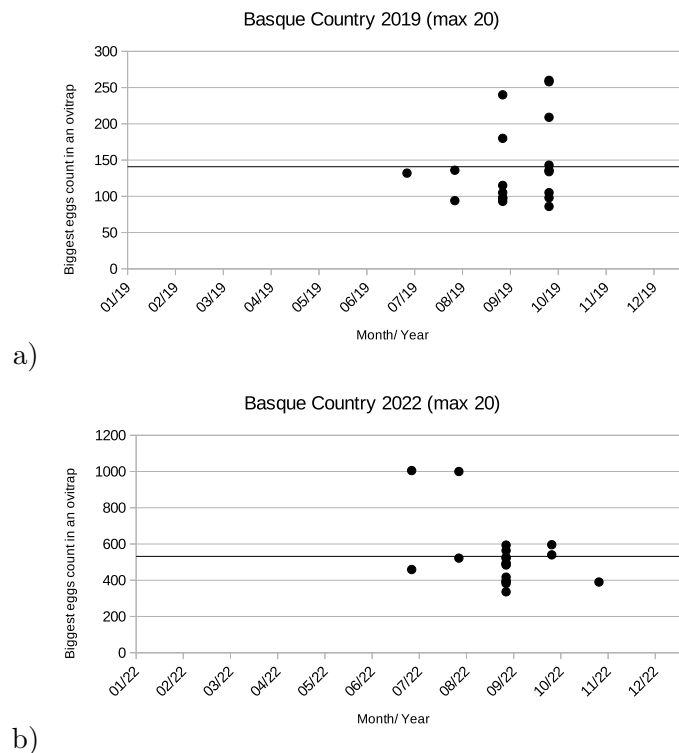

Figure 12: The largest 20 eggs counts in Basque Country in a) 2019, and b) 2022.

620 The expected number of autochthonous cases in the Basque Country,  
621 based on mosquito abundance in 2019, can be estimated as  $\langle I \rangle^* = 0.0671$ ,  
622 and in 2022 as  $\langle I \rangle^* = 0.5602$ , suggesting a potential rise in the number of  
623 cases. Although these estimates may indicate fewer than one person affected,  
624 stochastic simulations suggest that clusters of infected cases could emerge in  
625 the coming years.

626 Using this approach, the risk can be calculated on a smaller spatial  
627 scale, such as at the provincial and municipal levels, as more data become  
628 available. Additionally, risk maps with finer spatial resolution, such as at the  
629 municipality level, can be generated. These maps would consider imported  
630 cases, mosquito abundance, and the combined risk of autochthonous cases,  
631 providing a more detailed risk assessment.

## 632 5 Discussion and conclusion

633 Driven by climate change and increased global travel, mosquito-borne diseases  
634 like dengue, Zika, and chikungunya, once confined to subtropical and tropical  
635 regions, are now being reported in non-endemic areas. Although most  
636 cases originate from infected travelers - referred to as imported cases - they  
637 can trigger unexpected autochthonous outbreaks in regions with competent  
638 mosquito vectors. This has been evident recently, with non-travel-related  
639 dengue cases reported in France and Italy, as noted by the European Center  
640 for Disease Prevention and Control [11].

641 In endemic areas, mathematical models have been developed to estimate  
642 disease outbreak risks, with the Basic Reproduction Number ( $R_0$ ) being  
643 widely used to assess the likelihood and intensity of outbreaks occurring  
644 throughout the year. This metric, which represents the average number of  
645 secondary cases produced by an infected individual in a completely susceptible  
646 population, is crucial for understanding the dynamics of disease spread in  
647 regions where transmission is ongoing. However, in non-endemic areas  
648 where no local cases have been recorded,  $R_0$  is typically less than 1 ( $R_0 <$   
649 1), indicating that the disease is not currently spreading within the local  
650 population. As a result,  $R_0$  is not a useful measure for assessing outbreak  
651 risks in these regions. Instead, alternative models and metrics must be used to  
652 account for the role of imported cases and the presence of competent mosquito  
653 vectors, which can introduce and potentially amplify disease transmission in  
654 previously unaffected areas.

655 In this study, a dynamic vector-host model is developed to assess the  
656 risk of autochthonous cases driven by imported infections in non-endemic  
657 regions. Using stochastic methods, the model analyzes waiting times for the  
658 first local cases and inter-event statistics of imported cases, with a specific  
659 application to the Basque Country. This approach incorporates imported  
660 cases and the presence of mosquito populations, relative to those in endemic  
661 regions, to estimate the risk of mosquito-borne disease outbreaks.

662 Stochastic simulations reveal that even in non-endemic regions with  
663 moderate mosquito abundance - such as 40% of that found in endemic areas  
664 - there is a potential for isolated autochthonous cases driven by imported  
665 infections, as well as the possibility of outbreak clusters. These simulations  
666 indicate that the dynamics of mosquito-borne disease transmission can be  
667 significantly influenced by the presence and density of mosquito populations,  
668 even at lower levels. By estimating the expected number of infected cases and  
669 assessing the risk of autochthonous infections based on imported case data  
670 and mosquito abundance, the model provides a robust tool for predicting

671 and managing mosquito-borne disease risks in non-endemic areas. This  
672 approach allows public health authorities to anticipate potential outbreaks  
673 and implement targeted interventions to mitigate the risk of disease spread.

674 By considering the Basque Country - a region in Spain with documented  
675 imported cases but no local cases to date - as a case study, we apply our  
676 method to assess the risk of an autochthonous disease outbreak. Essential  
677 data for this analysis include mosquito egg counts recorded by NEIKER  
678 across various localities and epidemiological information on viremic imported  
679 cases provided by the Epidemiology Unit of the Public Health Department  
680 of the Basque Country.

681 Using a Poisson process, we analytically computed the trend of imported  
682 cases and applied this method to data from the Basque Country for 2019  
683 and 2022. We also calculated the confidence intervals for the cumulative  
684 curve of imported cases via likelihood functions. It is important to note that  
685 for the years 2020 and 2021, very few or no imported cases were recorded  
686 due to travel restrictions imposed by the COVID-19 pandemic, resulting in  
687 insufficient data to apply our method effectively. Our analysis demonstrates  
688 that mosquito population abundance significantly impacts the likelihood  
689 and timing of autochthonous cases. This explains why autochthonous cases  
690 have been identified in countries like France and Italy but not yet in other  
691 European regions, such as the Basque Country. The findings underscore the  
692 critical importance of considering non-linear dynamics in disease transmission  
693 models, particularly near critical thresholds of mosquito abundance, and call  
694 for continued research into seasonality and other factors influencing mosquito  
695 abundance.

696 By coupling mosquito abundance calculations with the estimated mean  
697 number of imported cases in 2019, we apply the risk estimator developed  
698 through the stochastic framework. The expected number of autochthonous  
699 cases in the Basque Country rose from  $\langle I \rangle = 0.0671$  in 2019 to  $\langle I \rangle = 0.5602$   
700 in 2022, and this increasing trend is anticipated to continue in the coming  
701 years. Although these estimates suggest fewer than one case on average,  
702 stochastic simulations indicate that clusters of infected cases could emerge  
703 in the coming years.

704 Our approach allows for risk calculation on a smaller spatial scale, such  
705 as at provincial and municipal levels, as more data becomes available. The  
706 spatial distribution of imported cases versus the measurements points of  
707 ovitraps pose some challenges on spatial correlation of the risks, however  
708 it facilitates the creation of risk maps with finer spatial resolution, such  
709 as at the municipality level, which will be investigated in future research,  
710 providing a more detailed risk assessment for public health authorities.



## 711 Acknowledgments

712 This work is also supported by the ARBOSKADI project for monitoring  
713 vector-borne diseases in the Basque Country, Euskadi. We wish to extend  
714 our acknowledgments to Jesús Ángel Ocio Armentia, Oscar Goñi Laguardia  
715 and Ana Ramírez de La Peciña Pérez, Dirección de Salud Pública for their  
716 fruitful discussions, and to Madalen Oribe Amores, Unidad de Vigilancia  
717 Epidemiológica de Bizkaia, for her cooperation in providing the requested  
718 epidemiological data that was essential for carrying out this research.

719 M.A. acknowledges the financial support by the Ministerio de Ciência e In-  
720 novacion (MICINN) of the Spanish Government through the Ramon y Cajal  
721 grant RYC2021-031380-I. This research is also supported by the Basque Gov-  
722 ernment through the “Mathematical Modeling Applied to Health” (BMTF)  
723 Project, BERC 2022-2025 program and by the Spanish Ministry of Sciences,  
724 Innovation and Universities: BCAM Severo Ochoa accreditation CEX2021-  
725 001142-S / MICIN / AEI / 10.13039/501100011033.

## 726 References

- 727 [1] Paz S. Climate change: A driver of increasing vector-borne disease  
728 transmission in non-endemic areas. 2024 PLOS Medicine;21(4):e1004382.  
729 Available from: <https://dx.plos.org/10.1371/journal.pmed.1004382>.
- 730 [2] Communicable disease threats report 10-16 August 2024 week 33. Euro-  
731 pean Centre for Disease Prevention and Control; 2024. Available from:  
732 [https://www.ecdc.europa.eu/en/publications-data/communicable-](https://www.ecdc.europa.eu/en/publications-data/communicable-disease-threats-report-10-16-august-2024-week-33)  
733 [disease-threats-report-10-16-august-2024-week-33](https://www.ecdc.europa.eu/en/publications-data/communicable-disease-threats-report-10-16-august-2024-week-33).
- 734 [3] Dengue - Global situation. World Health Organization; 2024. Available  
735 from: [https://www.who.int/emergencies/disease-outbreak-news/item/](https://www.who.int/emergencies/disease-outbreak-news/item/2024-DON518)  
736 [2024-DON518](https://www.who.int/emergencies/disease-outbreak-news/item/2024-DON518).
- 737 [4] Aedes invasive mosquitoes - current known distribution: July 2024.  
738 European Centre for Disease Prevention and Control; 2024. Avail-  
739 able from: [https://www.ecdc.europa.eu/en/publications-data/aedes-](https://www.ecdc.europa.eu/en/publications-data/aedes-invasive-mosquitoes-current-known-distribution-july-2024)  
740 [invasive-mosquitoes-current-known-distribution-july-2024](https://www.ecdc.europa.eu/en/publications-data/aedes-invasive-mosquitoes-current-known-distribution-july-2024).
- 741 [5] Laporta GZ, Potter AM, Oliveira JFA, et al. Global distribution of Aedes  
742 aegypti and Aedes albopictus in a climate change scenario of regional rivalry.  
743 2023 Insects;14(1):49. Available from: [https://www.mdpi.com/2075-4450/14/](https://www.mdpi.com/2075-4450/14/1/49)  
744 [1/49](https://www.mdpi.com/2075-4450/14/1/49).
- 745 [6] Colón-González FJ, Sewe MO, Tompkins AM, et al. Projecting the risk of  
746 mosquito-borne diseases in a warmer and more populated world: A multi-model,

- 747 multi-scenario intercomparison modelling study. 2021 *The Lancet Planetary*  
748 *Health*;5(7):e404-14. Available from: [https://linkinghub.elsevier.com/](https://linkinghub.elsevier.com/retrieve/pii/S2542519621001327)  
749 [retrieve/pii/S2542519621001327](https://linkinghub.elsevier.com/retrieve/pii/S2542519621001327).
- 750 [7] Saldaña F, Stollenwerk N, Van Dierdonck JB, et al. Modeling spillover dynam-  
751 ics: Understanding emerging pathogens of public health concern. 2024 *Scien-*  
752 *tific Reports*;14(1):9823. Available from: [https://www.nature.com/articles/](https://www.nature.com/articles/s41598-024-60661-y)  
753 [s41598-024-60661-y](https://www.nature.com/articles/s41598-024-60661-y).
- 754 [8] Young MJ, Fefferman NH. The dynamics of disease mediated invasions by  
755 hosts with immune reproductive tradeoff. 2022 *Scientific Reports*;12(1):4108.  
756 Available from: <https://www.nature.com/articles/s41598-022-07962-2>.
- 757 [9] Zardini A, Menegale F, Gobbi A, et al. Estimating the potential risk of  
758 transmission of arboviruses in the Americas and Europe: A modelling study.  
759 2024 *The Lancet Planetary Health*;8(1):e30-40. Available from: [https://](https://linkinghub.elsevier.com/retrieve/pii/S2542519623002528)  
760 [linkinghub.elsevier.com/retrieve/pii/S2542519623002528](https://linkinghub.elsevier.com/retrieve/pii/S2542519623002528).
- 761 [10] Dengue outbreak in Madeira, Portugal, October – November 2012.  
762 European Centre for Disease Prevention and Control; 2013. Avail-  
763 able from: [https://www.ecdc.europa.eu/en/publications-data/dengue-](https://www.ecdc.europa.eu/en/publications-data/dengue-outbreak-madeira-portugal-october-november-2012)  
764 [outbreak-madeira-portugal-october-november-2012](https://www.ecdc.europa.eu/en/publications-data/dengue-outbreak-madeira-portugal-october-november-2012).
- 765 [11] Local transmission of dengue virus in mainland EU/EEA, 2010-present.  
766 European Centre for Disease Prevention and Control; 2024. Available from:  
767 [https://www.ecdc.europa.eu/en/all-topics-z/dengue/surveillance-](https://www.ecdc.europa.eu/en/all-topics-z/dengue/surveillance-and-disease-data/autochthonous-transmission-dengue-virus-eueea)  
768 [and-disease-data/autochthonous-transmission-dengue-virus-eueea](https://www.ecdc.europa.eu/en/all-topics-z/dengue/surveillance-and-disease-data/autochthonous-transmission-dengue-virus-eueea).
- 769 [12] Fernández-Martínez B, Pampaka D, Suárez-Sánchez P, et al. Spatial anal-  
770 ysis for risk assessment of dengue in Spain. 2023 *Enfermedades Infec-*  
771 *ciosas y Microbiología Clínica*:S0213005X23001830. Available from: [https:](https://linkinghub.elsevier.com/retrieve/pii/S0213005X23001830)  
772 [//linkinghub.elsevier.com/retrieve/pii/S0213005X23001830](https://linkinghub.elsevier.com/retrieve/pii/S0213005X23001830).
- 773 [13] Gossner CM, Ducheyne E, Schaffner F. Increased risk for au-  
774 tochthonous vector-borne infections transmitted by *Aedes albopic-*  
775 *tus* in continental Europe. 2018 *Eurosurveillance*;23(24). Avail-  
776 able from: [https://www.eurosurveillance.org/content/10.2807/1560-](https://www.eurosurveillance.org/content/10.2807/1560-7917.ES.2018.23.24.1800268)  
777 [7917.ES.2018.23.24.1800268](https://www.eurosurveillance.org/content/10.2807/1560-7917.ES.2018.23.24.1800268).
- 778 [14] Massad E, Amaku M, Coutinho FAB, et al. Estimating the probability of dengue  
779 virus introduction and secondary autochthonous cases in Europe. 2018 *Scien-*  
780 *tific Reports*;8(1):4629. Available from: [https://www.nature.com/articles/](https://www.nature.com/articles/s41598-018-22590-5)  
781 [s41598-018-22590-5](https://www.nature.com/articles/s41598-018-22590-5).
- 782 [15] Sohail A, Anders KL, McGuinness SL, et al. The epidemiology of imported  
783 and locally acquired dengue in Australia, 2012–2022. 2024 *Journal of Travel*  
784 *Medicine*;31(2):taae014. Available from: [https://academic.oup.com/jtm/](https://academic.oup.com/jtm/article/doi/10.1093/jtm/taae014/7577676)  
785 [article/doi/10.1093/jtm/taae014/7577676](https://academic.oup.com/jtm/article/doi/10.1093/jtm/taae014/7577676).

- 786 [16] Blasius B. Power-law distribution in the number of confirmed COVID-19 cases.  
787 2020 *Chaos: An Interdisciplinary Journal of Nonlinear Science*;30(9):093123.  
788 Available from: [https://pubs.aip.org/cha/article/30/9/093123/341972/](https://pubs.aip.org/cha/article/30/9/093123/341972/Power-law-distribution-in-the-number-of-confirmed)  
789 [Power-law-distribution-in-the-number-of-confirmed](https://pubs.aip.org/cha/article/30/9/093123/341972/Power-law-distribution-in-the-number-of-confirmed).
- 790 [17] Esquivel-Gómez JJ, Barajas-Ramírez JG. Rapid disease spread on dense  
791 networks with power-law topology. 2024 *Eur Phys J B*;97(53). Available from:  
792 <https://doi.org/10.1140/epjb/s10051-024-00675-7>.
- 793 [18] Meyer S, Held LH. Power-law models for infectious disease spread. 2014  
794 *The Annals of Applied Statistics*;8(3):1612-39. Available from: [http://](http://www.jstor.org/stable/24522277)  
795 [www.jstor.org/stable/24522277](http://www.jstor.org/stable/24522277).
- 796 [19] Stollenwerk N, Jansen V. *Population Biology and Criticality: From Critical*  
797 *Birth-Death Processes to Self-Organized Criticality in Mutation Pathogen*  
798 *Systems*. IMPERIAL COLLEGE PRESS; 2010. Available from: [https:](https://www.worldscientific.com/worldscibooks/10.1142/p645)  
799 [//www.worldscientific.com/worldscibooks/10.1142/p645](https://www.worldscientific.com/worldscibooks/10.1142/p645).
- 800 [20] Cai L, Li X. Analysis of a simple vector-host epidemic model with  
801 direct transmission. 2010 *Discrete Dynamics in Nature and Soci-*  
802 *ety*;2010(1):679613. Available from: [https://onlinelibrary.wiley.com/doi/](https://onlinelibrary.wiley.com/doi/abs/10.1155/2010/679613)  
803 [abs/10.1155/2010/679613](https://onlinelibrary.wiley.com/doi/abs/10.1155/2010/679613).
- 804 [21] Esteva L, Vargas C. Analysis of a dengue disease transmission model.  
805 1998 *Mathematical Biosciences*;131-151(2):220-240. Available from: [https:](https://doi.org/10.1016/S0025-5564(98)10003-2)  
806 [//doi.org/10.1016/S0025-5564\(98\)10003-2](https://doi.org/10.1016/S0025-5564(98)10003-2).
- 807 [22] Martcheva M. In: *Vector-borne diseases*. Boston, MA: Springer US; 2015. p.  
808 67-89. Available from: [https://doi.org/10.1007/978-1-4899-7612-3\\_4](https://doi.org/10.1007/978-1-4899-7612-3_4).
- 809 [23] Pandey A, Mubayi A, Medlock J. Comparing vector-host and SIR mod-  
810 els for dengue transmission. 2013 *Mathematical Biosciences*;246(2):252-  
811 9. Available from: [https://www.sciencedirect.com/science/article/pii/](https://www.sciencedirect.com/science/article/pii/S0025556413002435)  
812 [S0025556413002435](https://www.sciencedirect.com/science/article/pii/S0025556413002435).
- 813 [24] Ross R. An application of the theory of probabilities to the study of a priori  
814 pathometry.—Part I. 1916 *Proceedings of the Royal Society of London Series A,*  
815 *Containing Papers of a Mathematical and Physical Character*;92(638):204-30.  
816 Available from: [https://royalsocietypublishing.org/doi/abs/10.1098/](https://royalsocietypublishing.org/doi/abs/10.1098/rspa.1916.0007)  
817 [rspa.1916.0007](https://royalsocietypublishing.org/doi/abs/10.1098/rspa.1916.0007).
- 818 [25] Rashkov P, Venturino E, Aguiar M, et al. On the role of vector mod-  
819 eling in a minimalistic epidemic model. 2019 *Mathematical Biosciences*  
820 *and Engineering*;16(5):4314-38. Available from: [http://www.aimspress.com/](http://www.aimspress.com/article/10.3934/mbe.2019215)  
821 [article/10.3934/mbe.2019215](http://www.aimspress.com/article/10.3934/mbe.2019215).

- 822 [26] Rocha F, Aguiar M, Souza M, et al. Time-scale separation and centre  
823 manifold analysis describing vector-borne disease dynamics. 2013 Interna-  
824 tional Journal of Computer Mathematics;90(10):2105-25. Available from:  
825 <http://www.tandfonline.com/doi/abs/10.1080/00207160.2013.783208>.
- 826 [27] Aguiar M, Kooi BW, Martins J, et al. Scaling of stochasticity in dengue  
827 hemorrhagic fever epidemics. 2012 Mathematical Modelling of Natural  
828 Phenomena;7(3):1-11. Available from: <http://eudml.org/doc/222190>.
- 829 [28] Aguiar M, Ballesteros S, Kooi BW, et al. The role of seasonality and import  
830 in a minimalistic multi-strain dengue model capturing differences between  
831 primary and secondary infections: Complex dynamics and its implications for  
832 data analysis. 2011 Journal of Theoretical Biology;289:181-96. Available from:  
833 <https://linkinghub.elsevier.com/retrieve/pii/S0022519311004462>.
- 834 [29] Aguiar M, Kooi B, Pugliese A, et al.. Time scale separation in the vector  
835 borne disease model SIRUV via center manifold analysis; 2021. Available from:  
836 <http://medrxiv.org/lookup/doi/10.1101/2021.04.06.21254992>.
- 837 [30] Kermack WO, McKendrick AG, Walker GT. A contribution to the mathemati-  
838 cal theory of epidemics. 1927 Proceedings of the Royal Society of London Series  
839 A, Containing Papers of a Mathematical and Physical Character;115(772):700-  
840 21. Available from: [https://royalsocietypublishing.org/doi/abs/](https://royalsocietypublishing.org/doi/abs/10.1098/rspa.1927.0118)  
841 [10.1098/rspa.1927.0118](https://royalsocietypublishing.org/doi/abs/10.1098/rspa.1927.0118).
- 842 [31] Esteva L, Vargas C. A model for dengue disease with variable human population.  
843 1999 J Math Biol;38:220–240. Available from: [https://doi.org/10.1007/](https://doi.org/10.1007/s002850050147)  
844 [s002850050147](https://doi.org/10.1007/s002850050147).
- 845 [32] Heidrich P, Jayathunga Y, Bock W, et al. Prediction of dengue cases based  
846 on human mobility and seasonality—An example for the city of Jakarta. 2021  
847 Mathematical Methods in the Applied Sciences;44(17):13633-58. Available  
848 from: <https://onlinelibrary.wiley.com/doi/10.1002/mma.7648>.
- 849 [33] Rocha F, Mateus L, Skwara U, et al. Understanding dengue fever dynamics:  
850 A study of seasonality in vector-borne disease models. 2016 International  
851 Journal of Computer Mathematics;93(8):1405-22. Available from: [http://](http://www.tandfonline.com/doi/full/10.1080/00207160.2015.1050961)  
852 [www.tandfonline.com/doi/full/10.1080/00207160.2015.1050961](http://www.tandfonline.com/doi/full/10.1080/00207160.2015.1050961).
- 853 [34] Skwara U, Mozyrska D, Aguiar M, et al. Applications of fractional calculus  
854 to mathematical modelling of vector-borne diseases. 2021 Available at SSRN.  
855 Available from: <http://dx.doi.org/10.2139/ssrn.4610210>.
- 856 [35] Skwara U, Mozyrska D, Aguiar M, et al. Dynamics of vector-borne dis-  
857 eases through the lens of systems incorporating fractional-order deriva-  
858 tives. 2024 Chaos, Solitons & Fractals;181:114643. Available from: [https://](https://linkinghub.elsevier.com/retrieve/pii/S0960077924001942)  
859 [linkinghub.elsevier.com/retrieve/pii/S0960077924001942](https://linkinghub.elsevier.com/retrieve/pii/S0960077924001942).

- 860 [36] Guidelines for the surveillance of invasive mosquitoes in Europe. European  
861 Centre for Disease Prevention and Control; 2012. Available from: [https://www.ecdc.europa.eu/sites/default/files/media/en/publications/  
862 Publications/TER-Mosquito-surveillance-guidelines.pdf](https://www.ecdc.europa.eu/sites/default/files/media/en/publications/Publications/TER-Mosquito-surveillance-guidelines.pdf).  
863
- 864 [37] Fung T, Clapham HE, Chisholm RA. Temporary Cross-Immunity as a Plausible  
865 Driver of Asynchronous Cycles of Dengue Serotypes. 2023 *Bulletin of Math-  
866 ematical Biology*;85(12):124. Available from: [https://link.springer.com/  
867 10.1007/s11538-023-01226-4](https://link.springer.com/10.1007/s11538-023-01226-4).
- 868 [38] Sabin AB. Research on dengue during World War II. 1952 *The American  
869 Journal of Tropical Medicine and Hygiene*;1:30-50.
- 870 [39] Snow GE, Haaland B, Ooi EE, et al. Research on Dengue During  
871 World War II Revisited. 2014 *The American Society of Tropical Medicine  
872 and Hygiene*;91(6):1203-17. Available from: [https://www.ajtmh.org/view/  
873 journals/tpmd/91/6/article-p1203.xml](https://www.ajtmh.org/view/journals/tpmd/91/6/article-p1203.xml).
- 874 [40] Waggoner JJ, Balmaseda A, Gresh L, et al. Homotypic dengue virus reinfections  
875 in nicaraguan children. 2016 *Journal of Infectious Diseases*;214(7):986-93. Avail-  
876 able from: [https://academic.oup.com/jid/article-lookup/doi/10.1093/  
877 infdis/jiw099](https://academic.oup.com/jid/article-lookup/doi/10.1093/infdis/jiw099).
- 878 [41] Focks DA. A review of entomological sampling methods and indicators for  
879 dengue vectors. World Health Organization on behalf of the Special Programme  
880 for Research and Training in Tropical Diseases; 2023. Available from: <https://iris.who.int/bitstream/handle/10665/68575/?sequence=1>.  
881
- 882 [42] Oliveira Noleto JV, Moura do Nascimento Moraes HL, De Moura Lima T,  
883 et al. Use of ovitraps for the seasonal and spatial monitoring of *Aedes* spp.  
884 in an area endemic for arboviruses in Northeast Brazil. 2020 *The Journal  
885 of Infection in Developing Countries*;14(04):387-93. Available from: <https://jidc.org/index.php/journal/article/view/12245>.  
886
- 887 [43] Sasmita HI, Neoh KB, Yusmalinar S, et al. Ovitrap surveillance of dengue  
888 vector mosquitoes in Bandung City, West Java Province, Indonesia. 2021  
889 *PLOS Neglected Tropical Diseases*;15(10):e0009896. Available from: <https://dx.plos.org/10.1371/journal.pntd.0009896>.  
890
- 891 [44] Mateus L, Ghaffari P, Skwara U, et al. Semiclassical approximations of stochas-  
892 tic epidemiological processes towards parameter estimation using as prime  
893 example the SIS system with import. 2016 *Ecological Complexity*;27:63-  
894 73. Available from: [https://linkinghub.elsevier.com/retrieve/pii/  
895 S1476945X15000963](https://linkinghub.elsevier.com/retrieve/pii/S1476945X15000963).
- 896 [45] Gillespie DT. Stochastic Simulation of Chemical Kinetics. 2007 *An-  
897 nual Review of Physical Chemistry*;58(1):35-55. Available from: [https://  
898 www.annualreviews.org/doi/10.1146/annurev.physchem.58.032806.104637](https://www.annualreviews.org/doi/10.1146/annurev.physchem.58.032806.104637).

- 899 [46] Stollenwerk N, Sommer PF, Kooi B, et al. Hopf and torus bifurca-  
900 tions, torus destruction and chaos in population biology. 2017 *Ecological*  
901 *Complexity*;30:91-9. Available from: [https://linkinghub.elsevier.com/](https://linkinghub.elsevier.com/retrieve/pii/S1476945X16301143)  
902 [retrieve/pii/S1476945X16301143](https://linkinghub.elsevier.com/retrieve/pii/S1476945X16301143).
- 903 [47] Mateus L, Stollenwerk N, Zambrini JC. Stochastic models in popula-  
904 tion biology: From dynamic noise to Bayesian description and model  
905 comparison for given data sets. 2013 *International Journal of Computer*  
906 *Mathematics*;90(10):2161-73. Available from: [http://www.tandfonline.com/](http://www.tandfonline.com/doi/abs/10.1080/00207160.2013.792924)  
907 [doi/abs/10.1080/00207160.2013.792924](http://www.tandfonline.com/doi/abs/10.1080/00207160.2013.792924).
- 908 [48] Lübeck S. Universal scaling behavior of non-equilibrium phase transi-  
909 tions. 2004 *International Journal of Modern Physics B*;18(31n32):3977-  
910 4118. Available from: [https://www.worldscientific.com/doi/abs/10.1142/](https://www.worldscientific.com/doi/abs/10.1142/S0217979204027748)  
911 [S0217979204027748](https://www.worldscientific.com/doi/abs/10.1142/S0217979204027748).
- 912 [49] Cevidanes A, Goiri F, Barandika JF, et al. Invasive *Aedes* mosquitoes in  
913 an urban—peri-urban gradient in northern Spain: Evidence of the wide dis-  
914 tribution of *Aedes japonicus*. 2023 *Parasites & Vectors*;16(1):234. Avail-  
915 able from: [https://parasitesandvectors.biomedcentral.com/articles/](https://parasitesandvectors.biomedcentral.com/articles/10.1186/s13071-023-05862-6)  
916 [10.1186/s13071-023-05862-6](https://parasitesandvectors.biomedcentral.com/articles/10.1186/s13071-023-05862-6).
- 917 [50] Basawa IV, Prakasa Rao BLS. *Statistical Inference for Stochastic Processes.*  
918 *Probability and Mathematical Statistics.* London New York: Academic Press;  
919 1980.
- 920 [51] Merberg A, Miller SJ. Course Notes for Math 162: Math-  
921 ematical Statistics The Cramér-Rao Inequality; 2008. Available  
922 from: [https://web.williams.edu/Mathematics/sjmiller/public\\_html/](https://web.williams.edu/Mathematics/sjmiller/public_html/BrownClasses/162/Handouts/CramerRaoHandout08.pdf)  
923 [BrownClasses/162/Handouts/CramerRaoHandout08.pdf](https://web.williams.edu/Mathematics/sjmiller/public_html/BrownClasses/162/Handouts/CramerRaoHandout08.pdf).

## 924 Appendices:

### 925 A Analysis of mean and variance via hypothetical 926 ensembles of data

927 In this section, we summarize both the frequentist and Bayesian approaches  
928 to parameter estimation, along with their theoretical foundations.

929 In the previous analysis, we constructed the maximum likelihood estima-  
930 tor (MLE) and assessed its variance using frequentist methods. The variance  
931 of the MLE was estimated as  $\sigma^2 = \frac{\hat{\lambda}^2}{n}$ , which was derived from the curvature  
932 of the likelihood function.

933 To theoretically justify this result, we consider the likelihood function  
934  $L(\lambda) = p(\underline{\tau} | \lambda)$ , which describes the probability of observing data ensembles  
935 given a particular model. The Gaussian approximation of the likelihood  
936 function provides a good fit for the distribution of estimators  $p(\hat{\lambda} | \lambda)$ . This  
937 fit can be validated through simulations that evaluate multiple data sets  
938 and examine the resulting histogram of estimators  $\hat{\lambda}_i$ . Although an exact  
939 analytical solution for the ensemble variance  $\langle (\hat{\lambda} - \langle \hat{\lambda} \rangle)^2 \rangle$  is not feasible, it can  
940 be approximated using the variance expression obtained from the negative  
941 inverse Fisher matrix [50]

$$\sigma^2 = \frac{\hat{\lambda}^2}{n} .$$

942 This expression is consistent with the Cramér-Rao inequality [51], which  
943 provides a lower bound for the variance of  $\lambda$  given by  $\lambda^2/n$ . The Cramér-Rao  
944 inequality involves the true but unknown parameter  $\lambda$ , while our heuristic  
945 method uses the estimator  $\hat{\lambda}$ . The complete form of the inequality also  
946 accounts for any bias in the estimator, resulting in

$$\langle (\hat{\lambda} - \langle \hat{\lambda} \rangle)^2 \rangle \geq \frac{\lambda^2}{n} \left( \frac{n}{n-1} \right)^2 ,$$

947 where the impact of bias diminishes quickly. Detailed calculations related  
948 to the Fisher information and the Cramér-Rao inequality can be found in  
949 Appendix B.

950 The likelihood function  $L(\lambda) = p(\underline{\tau}_D | \lambda)$  from a single empirical data set  
951  $\underline{\tau}_D$  approximates the functional form of the distribution  $p(\hat{\lambda} | \lambda)$  obtained by  
952 marginalizing over all possible hypothetical data sets  $\underline{\tau}$ , even if the estimator  
953  $\hat{\lambda}$  deviates from the original parameter  $\lambda$ .

954 In contrast, Bayesian analysis updates prior beliefs about the parameter  
955  $\lambda$  using the empirical likelihood function from a single data set. The prior  
956 distribution  $p(\lambda)$ , specified before observing the data, is updated to form  
957 the posterior distribution  $p(\lambda | \mathcal{T}_D)$ . This posterior provides estimates and  
958 confidence intervals and can be applied to the empirical data of imported  
959 cases in the Basque Country, as demonstrated in the analysis for the Basque  
960 Country. Due to the very limited data, the maximum likelihood method  
961 of frequentists provides reasonable information, while the more elaborate  
962 Bayesian approach might not refine the results significantly in the present  
963 study. Hence, we focus on the frequentist framework here.

## 964 **B Calculation of the lower bound of the ensemble** 965 **variance of maximum likelihood estimators**

### 966 **B.1 Conditioned ensemble averages, the starting point of the** 967 **analysis, to the variance inequality**

968 Conditioned ensemble averages serve as the starting point for analyzing the  
969 variance inequality. For the ensemble mean of estimators, we have

$$\langle \hat{\lambda} \rangle = \int_0^\infty \hat{\lambda} p(\hat{\lambda} | \lambda) d\hat{\lambda} \quad , \quad (68)$$

970 where the probability  $p(\hat{\lambda} | \lambda)$  of estimators  $\hat{\lambda}$ , given a stochastic model with  
971 parameter  $\lambda$ , can be expressed by marginalizing over ensembles of data sets  
972  $\mathcal{T}$  obtained from the likelihood function

$$L(\lambda) = p(\mathcal{T} | \lambda) = \lambda^n e^{-\lambda \sum_{i=1}^n \tau_i} \quad .$$

973 The likelihood function  $L$  gives the probability for the data given an underly-  
974 ing model with parameter  $\lambda$ . These data determine the estimators  $\hat{\lambda} = f(\mathcal{T})$   
975 via the probability

$$p(\hat{\lambda} | \mathcal{T}) = \delta(\hat{\lambda} - f(\mathcal{T})) \quad ,$$

976 where  $\hat{\lambda} = f(\mathcal{T}) = \frac{1}{\frac{1}{n} \sum_{i=1}^n \tau_i}$ , with the analytic functional form of the maxi-  
977 mum likelihood estimator, giving

$$p(\hat{\lambda} | \lambda) = \int_0^\infty \cdots \int_0^\infty p(\hat{\lambda} | \mathcal{T}) \cdot p(\mathcal{T} | \lambda) d^n \mathcal{T} \quad , \quad (69)$$



which essentially marginalizes via

$$p(\hat{\lambda} | \underline{\tau}) \cdot p(\underline{\tau} | \lambda) = p(\hat{\lambda}, \underline{\tau} | \lambda)$$

978 the joint probability  $p(\hat{\lambda}, \underline{\tau} | \lambda)$  over  $\underline{\tau}$ . Hence, we have

$$\begin{aligned} \langle \hat{\lambda} \rangle &= \int \int \cdots \int \hat{\lambda} p(\hat{\lambda} | \underline{\tau}) \cdot p(\underline{\tau} | \lambda) d^n \underline{\tau} d\hat{\lambda} \\ &= \int \cdots \int \int \hat{\lambda} \delta(\hat{\lambda} - f(\underline{\tau})) d\hat{\lambda} p(\underline{\tau} | \lambda) d^n \underline{\tau} \\ &= \int \cdots \int f(\underline{\tau}) p(\underline{\tau} | \lambda) d^n \underline{\tau} \quad , \end{aligned} \tag{70}$$

979 which gives, for the exponential distribution, after some calculations, the  
980 explicit result

$$\langle \hat{\lambda} \rangle = \frac{n}{n-1} \lambda \quad ,$$

981 essentially via deriving and solving the ordinary differential equation

$$\frac{d}{d\lambda} \langle \hat{\lambda} \rangle = n \frac{\langle \hat{\lambda} \rangle}{\lambda} - n \quad ,$$

982 via the variable transformation  $z := \langle \hat{\lambda} \rangle / \lambda$ , hence

$$\langle \hat{\lambda} \rangle = z \cdot \lambda = \langle \hat{\lambda} \rangle(z, \lambda) \quad .$$

983 Then, the bias of the estimator is defined as the deviation of the ensemble  
984 mean of the estimator  $\langle \hat{\lambda} \rangle$  and the original parameter  $\lambda$ , that is

$$b(\lambda) := \langle \hat{\lambda} \rangle - \lambda \quad ,$$

985 which is here in the case of the exponential distribution  $b(\lambda) = \frac{1}{n-1} \lambda$ ,  
986 converging quickly to zero with increasing number  $n$  of data points.

987 An analogous calculation for the variance of the estimator gives

$$\begin{aligned} \langle (\hat{\lambda} - \langle \hat{\lambda} \rangle)^2 \rangle &= \int \int \cdots \int (\hat{\lambda} - \langle \hat{\lambda} \rangle)^2 p(\hat{\lambda} | \underline{\tau}) \cdot p(\underline{\tau} | \lambda) d^n \underline{\tau} d\hat{\lambda} \\ &= \int \cdots \int \int (\hat{\lambda} - \langle \hat{\lambda} \rangle)^2 \delta(\hat{\lambda} - f(\underline{\tau})) d\hat{\lambda} p(\underline{\tau} | \lambda) d^n \underline{\tau} \tag{71} \\ &= \int \cdots \int (f(\underline{\tau}) - \langle \hat{\lambda} \rangle)^2 p(\underline{\tau} | \lambda) d^n \underline{\tau} \\ &= \int \cdots \int (f(\underline{\tau})^2 - \langle \hat{\lambda} \rangle^2) p(\underline{\tau} | \lambda) d^n \underline{\tau} \quad , \end{aligned}$$

988 where in the last step we used in expectation  $\langle(\hat{\lambda} - \langle\hat{\lambda}\rangle)^2\rangle = \langle\hat{\lambda}\rangle^2 - \langle\hat{\lambda}\rangle^2$ . This  
 989 can only be treated via an inequality giving a lower bound of the estimator  
 990 variance.

991 In order to apply the Cauchy-Schwarz inequality, (which is in ordinary  
 992 vector spaces relating the scalar product of two vectors to the Euclidian  
 993 norm of the vectors as  $\underline{g} \cdot \underline{h} \leq \|\underline{g}\| \cdot \|\underline{h}\|$ ), we first analyze

$$\begin{aligned} \frac{d}{d\lambda}\langle\hat{\lambda}\rangle &= \int \dots \int f(\tau) \frac{d}{d\lambda} p(\tau|\lambda) d^n \tau \\ &= \int \dots \int f(\tau) \left( \frac{d}{d\lambda} \ln p(\tau|\lambda) \right) p(\tau|\lambda) d^n \tau \\ &= \int \dots \int f(\tau) \sqrt{p(\tau|\lambda)} \cdot \left( \frac{d}{d\lambda} \ln p(\tau|\lambda) \right) \sqrt{p(\tau|\lambda)} d^n \tau \quad , \end{aligned} \tag{72}$$

994 where in the last step the integrand is written as a product of two functions  
 995  $g(\tau) := f(\tau) \sqrt{p(\tau|\lambda)}$  and  $h(\tau) := \left( \frac{d}{d\lambda} \ln p(\tau|\lambda) \right) \sqrt{p(\tau|\lambda)}$  to give in the  
 996 Cauchy-Schwarz inequality, now for integrals, the treatable expressions in  
 997 form of expectation integrals.

998 After we considered  $\frac{d}{d\lambda}\langle\hat{\lambda}\rangle$  evaluating the definition of  $\langle\hat{\lambda}\rangle$  we now evaluate  
 999 from the definition of the bias  $b(\lambda) := \langle\hat{\lambda}\rangle - \lambda$ , hence  $\langle\hat{\lambda}\rangle = \lambda + b(\lambda)$  giving

$$\frac{d}{d\lambda}\langle\hat{\lambda}\rangle = 1 + \frac{d}{d\lambda} b(\lambda) \quad . \tag{73}$$

1000 Applying, thus, the Cauchy-Schwarz inequality replacing the sums by inte-  
 1001 grals and the finite dimensional vectors by functions, we get

$$\begin{aligned} \left( \frac{d}{d\lambda}\langle\hat{\lambda}\rangle \right)^2 &= \left( 1 + \frac{d}{d\lambda} b(\lambda) \right)^2 \\ &= \left( \int \dots \int f(\tau) \sqrt{p(\tau|\lambda)} \cdot \left( \frac{d}{d\lambda} \ln p(\tau|\lambda) \right) \sqrt{p(\tau|\lambda)} d^n \tau \right)^2 \\ &= \left( \int \dots \int g(\tau) \cdot h(\tau) d^n \tau \right)^2 \quad , \end{aligned} \tag{74}$$

1002 and applying the Cauchy-Schwarz inequality

$$\begin{aligned}
 \left(1 + \frac{d}{d\lambda} b(\lambda)\right)^2 &= \left(\int \dots \int g(\tau) \cdot h(\tau) d^n \underline{\tau}\right)^2 & (75) \\
 &\leq \int \dots \int g^2(\tau) d^n \underline{\tau} \cdot \int \dots \int h^2(\tau) d^n \underline{\tau} \\
 &= \int \dots \int f^2(\underline{\tau}) p(\underline{\tau}|\lambda) d^n \underline{\tau} \\
 &\quad \cdot \int \dots \int \left(\frac{d}{d\lambda} \ln p(\underline{\tau}|\lambda)\right)^2 p(\underline{\tau}|\lambda) d^n \underline{\tau} ,
 \end{aligned}$$

1003 and hence, the inequality

$$\int \dots \int f^2(\underline{\tau}) p(\underline{\tau}|\lambda) d^n \underline{\tau} \geq \frac{\left(1 + \frac{d}{d\lambda} b(\lambda)\right)^2}{\int \dots \int \left(\frac{d}{d\lambda} \ln p(\underline{\tau}|\lambda)\right)^2 p(\underline{\tau}|\lambda) d^n \underline{\tau}} \quad (76)$$

1004 holds, which only needs little refinement for the final result.

1005 For this, we consider now the normalization of the probability of the  
 1006 likelihood function  $\int \dots \int p(\underline{\tau}|\lambda) d^n \underline{\tau} = 1$  and its first two derivatives in  
 1007 respect to the parameter  $\lambda$ . We have

$$\frac{d}{d\lambda} \int \dots \int p(\underline{\tau}|\lambda) d^n \underline{\tau} = \frac{d}{d\lambda} 1 = 0 , \quad (77)$$

1008 and hence

$$0 = \int \dots \int \frac{d}{d\lambda} p(\underline{\tau}|\lambda) d^n \underline{\tau} = \int \dots \int \left(\frac{d}{d\lambda} \ln p(\underline{\tau}|\lambda)\right) p(\underline{\tau}|\lambda) d^n \underline{\tau} . \quad (78)$$

1009 The zero can be multiplied by any function to still be zero, and any function  
 1010 not depending on the data  $\underline{\tau}$  can be taken into the integrals. Hence, for the  
 1011 function  $\langle \hat{\lambda} \rangle$  we obtain

$$0 = \langle \hat{\lambda} \rangle \int \dots \int \frac{d}{d\lambda} p(\underline{\tau}|\lambda) d^n \underline{\tau} = \int \dots \int \langle \hat{\lambda} \rangle \frac{d}{d\lambda} p(\underline{\tau}|\lambda) d^n \underline{\tau} , \quad (79)$$

1012 and with this we can rewrite Eq. (72) as follows

$$\begin{aligned}
 \frac{d}{d\lambda} \langle \hat{\lambda} \rangle &= \int \dots \int f(\tau) \frac{d}{d\lambda} p(\tau|\lambda) d^n \tau - 0 \\
 &= \int \dots \int f(\tau) \frac{d}{d\lambda} p(\tau|\lambda) d^n \tau - \int \dots \int \langle \hat{\lambda} \rangle \frac{d}{d\lambda} p(\tau|\lambda) d^n \tau \\
 &= \int \dots \int (f(\tau) - \langle \hat{\lambda} \rangle) \frac{d}{d\lambda} p(\tau|\lambda) d^n \tau \\
 &= \int \dots \int (f(\tau) - \langle \hat{\lambda} \rangle) \left( \frac{d}{d\lambda} \ln p(\tau|\lambda) \right) p(\tau|\lambda) d^n \tau \quad (80) \\
 &= \int \dots \int (f(\tau) - \langle \hat{\lambda} \rangle) \sqrt{p(\tau|\lambda)} \cdot \left( \frac{d}{d\lambda} \ln p(\tau|\lambda) \right) \sqrt{p(\tau|\lambda)} d^n \tau,
 \end{aligned}$$

1013 and redefining  $g(\tau) := (f(\tau) - \langle \hat{\lambda} \rangle) \sqrt{p(\tau|\lambda)}$  allows us, in all subsequent  
 1014 calculations above, to replace  $f(\tau)$  by  $(f(\tau) - \langle \hat{\lambda} \rangle)$ . Hence, in Equation (76)  
 1015 we have now the complete variance on the left hand side of the inequality

$$\int \dots \int (f(\tau) - \langle \hat{\lambda} \rangle)^2 p(\tau|\lambda) d^n \tau \geq \frac{(1 + \frac{d}{d\lambda} b(\lambda))^2}{\int \dots \int \left( \frac{d}{d\lambda} \ln p(\tau|\lambda) \right)^2 p(\tau|\lambda) d^n \tau} \quad (81)$$

1016 as desired.

1017 The final step is to take the second derivative of the normalization of the  
 1018 likelihood function given by

$$\begin{aligned}
 0 &= \frac{d^2}{d\lambda^2} \int \dots \int p(\tau|\lambda) d^n \tau \\
 &= \int \dots \int \frac{d}{d\lambda} \frac{d}{d\lambda} p(\tau|\lambda) d^n \tau \\
 &= \int \dots \int \frac{d}{d\lambda} \left( \left( \frac{d}{d\lambda} \ln p(\tau|\lambda) \right) p(\tau|\lambda) \right) d^n \tau \quad (82) \\
 &= \int \dots \int \left( \frac{d^2}{d\lambda^2} \ln p(\tau|\lambda) \right) p(\tau|\lambda) + \left( \frac{d}{d\lambda} \ln p(\tau|\lambda) \right) \left( \frac{d}{d\lambda} p(\tau|\lambda) \right) d^n \tau \\
 &= \int \dots \int \left( \frac{d^2}{d\lambda^2} \ln p(\tau|\lambda) \right) p(\tau|\lambda) + \left( \frac{d}{d\lambda} \ln p(\tau|\lambda) \right) \left( \frac{d}{d\lambda} \ln p(\tau|\lambda) \right) p(\tau|\lambda) d^n \tau,
 \end{aligned}$$

1019 and hence

$$0 = \int \dots \int \left( \frac{d^2}{d\lambda^2} \ln p(\tau|\lambda) \right) p(\tau|\lambda) d^n \tau + \int \dots \int \left( \frac{d}{d\lambda} \ln p(\tau|\lambda) \right)^2 p(\tau|\lambda) d^n \tau \quad (83)$$

1020 OR

$$\int \dots \int \left( \frac{d}{d\lambda} \ln p(\underline{\tau}|\lambda) \right)^2 p(\underline{\tau}|\lambda) d^n \underline{\tau} = - \int \dots \int \left( \frac{d^2}{d\lambda^2} \ln p(\underline{\tau}|\lambda) \right) p(\underline{\tau}|\lambda) d^n \underline{\tau} \quad (84)$$

1021 with the Cramér-Rao inequality now in its final form given by

$$\int \dots \int (f(\underline{\tau}) - \langle \hat{\lambda} \rangle)^2 p(\underline{\tau}|\lambda) d^n \underline{\tau} \geq \frac{(1 + \frac{d}{d\lambda} b(\lambda))^2}{\int \dots \int \left( - \frac{d^2}{d\lambda^2} \ln p(\underline{\tau}|\lambda) \right) p(\underline{\tau}|\lambda) d^n \underline{\tau}} \quad (85)$$

1022 with the Fisher information

$$\langle - \frac{d^2}{d\lambda^2} \ln p(\underline{\tau}|\lambda) \rangle = \int \dots \int \left( - \frac{d^2}{d\lambda^2} \ln p(\underline{\tau}|\lambda) \right) p(\underline{\tau}|\lambda) d^n \underline{\tau} \quad (86)$$

1023 in its expectation value form in the denominator of the inequality and the  
1024 variance

$$\langle (\hat{\lambda} - \langle \hat{\lambda} \rangle)^2 \rangle = \int \dots \int (f(\underline{\tau}) - \langle \hat{\lambda} \rangle)^2 p(\underline{\tau}|\lambda) d^n \underline{\tau} \quad (87)$$

1025 So we can write in short

$$\langle (\hat{\lambda} - \langle \hat{\lambda} \rangle)^2 \rangle \geq \frac{(1 + \frac{db}{d\lambda})^2}{\langle - \frac{d^2}{d\lambda^2} \ln L(\lambda) \rangle} \quad (88)$$

1026 as the easiest memorizable form of the Cramer-Rao inequality, using the  
1027 likelihood notation  $L(\lambda) = p(\underline{\tau}|\lambda)$ , since the ensemble average is always taken  
1028 over the data points  $\underline{\tau}$  now.

## 1029 **B.2 Application to the exponential distribution and its max-** 1030 **imum likelihood estimator**

1031 We first calculate explicitly the ensemble mean of the estimator by deriving  
1032 an ODE and solving it. From Eq. (70) we have with  $L(\lambda) = p(\underline{\tau}|\lambda) =$   
1033  $\lambda^n e^{-\lambda \sum_{i=1}^n \tau_i}$  and  $f(\underline{\tau}) = \frac{1}{\frac{1}{n} \sum_{i=1}^n \tau_i}$  for the exponential distribution

$$\begin{aligned} \langle \hat{\lambda} \rangle &= \int \dots \int f(\underline{\tau}) \cdot p(\underline{\tau}|\lambda) d^n \underline{\tau} \\ &= \int \dots \int \frac{1}{\frac{1}{n} \sum_{i=1}^n \tau_i} \cdot \lambda^n e^{-\lambda \sum_{i=1}^n \tau_i} d^n \underline{\tau} \end{aligned} \quad (89)$$

1034 and hence, for its derivative

$$\begin{aligned}
 \frac{d}{d\lambda} \langle \hat{\lambda} \rangle &= \int \dots \int f(\underline{\tau}) \cdot \frac{d}{d\lambda} p(\underline{\tau}|\lambda) d^n \underline{\tau} & (90) \\
 &= \int \dots \int \frac{1}{\frac{1}{n} \sum_{i=1}^n \tau_i} \cdot \left( n\lambda^{n-1} \cdot e^{-\lambda \sum_{i=1}^n \tau_i} + \lambda^n \cdot \left( -\sum_{i=1}^n \tau_i \right) e^{-\lambda \sum_{i=1}^n \tau_i} \right) d^n \underline{\tau} \\
 &= \frac{n}{\lambda} \int \dots \int f(\underline{\tau}) \cdot p(\underline{\tau}|\lambda) d^n \underline{\tau} - n \int \dots \int p(\underline{\tau}|\lambda) d^n \underline{\tau} \\
 &= \frac{n}{\lambda} \langle \hat{\lambda} \rangle - n \quad ,
 \end{aligned}$$

1035 since the first integral  $\int \dots \int f(\underline{\tau}) \cdot p(\underline{\tau}|\lambda) d^n \underline{\tau} = \langle \hat{\lambda} \rangle$  gives the expectation  
 1036 value, and the second  $\int \dots \int p(\underline{\tau}|\lambda) d^n \underline{\tau} = 1$  gives the normalization of  
 1037 probability. Thus, we have the ODE for  $\langle \hat{\lambda} \rangle$  given by

$$\frac{d}{d\lambda} \langle \hat{\lambda} \rangle = n \frac{\langle \hat{\lambda} \rangle}{\lambda} - n \quad (91)$$

1038 to be solved. This can be done via the variable transformation  $z := \langle \hat{\lambda} \rangle / \lambda$ ,  
 1039 hence  $\langle \hat{\lambda} \rangle = z \cdot \lambda = \langle \hat{\lambda} \rangle(z, \lambda)$ . We transform the original ODE into an ODE  
 1040 in new variable

$$\frac{d}{d\lambda} \langle \hat{\lambda} \rangle = \frac{d\langle \hat{\lambda} \rangle}{dz} \frac{dz}{d\lambda} + \frac{d\langle \hat{\lambda} \rangle}{d\lambda} \frac{d\lambda}{d\lambda} = \lambda \frac{dz}{d\lambda} + z \quad (92)$$

1041 and on the other side of the original ODE

$$\frac{d}{d\lambda} \langle \hat{\lambda} \rangle = nz - n \quad (93)$$

1042 to be solved

$$\lambda \frac{dz}{d\lambda} + z = nz - n \quad (94)$$

1043 OR

$$\frac{dz}{d\lambda} = \frac{1}{\lambda} (n-1) \left( z - \frac{n}{n-1} \right) \quad (95)$$

1044 which can now be resolved easily via separation of variables. Then,

$$\int \frac{1}{z - \frac{n}{n-1}} dz = (n-1) \int \frac{1}{\lambda} d\lambda \quad , \quad (96)$$

1045 giving as general solution

$$\ln \left( z - \frac{n}{n-1} \right) + c_z = (n-1)(\ln \lambda + c_\lambda) \quad (97)$$

1046 and after some elementary steps, and replacing  $z$  with  $\langle \hat{\lambda} \rangle / \lambda$  again, we have

$$\langle \hat{\lambda} \rangle = \frac{n}{n-1} \lambda + c \cdot \lambda^n \quad (98)$$

1047 using integration constants  $c_z$  and  $c_\lambda$  to be combined to  $c = e^{(n-1)c_\lambda - c_z}$ . To  
 1048 leading order in  $\lambda$  we have the solution  $\langle \hat{\lambda} \rangle = \frac{n}{n-1} \lambda$ , since  $\lambda$  is in general a  
 1049 small number.

1050 Hence, for the bias  $b(\lambda) := \langle \hat{\lambda} \rangle - \lambda$  we have

$$b(\lambda) = \frac{1}{n-1} \lambda \quad (99)$$

1051 and in the expression for the Cramér-Rao bound of the ensemble variance

$$\langle (\hat{\lambda} - \langle \hat{\lambda} \rangle)^2 \rangle \geq \frac{(1 + \frac{db}{d\lambda})^2}{\langle -\frac{d^2}{d\lambda^2} \ln L(\lambda) \rangle} = \frac{\lambda^2}{n} \cdot \left( \frac{n}{n-1} \right)^2 \quad (100)$$

1052 since the expectation of the negative second derivative of the log-likelihood  
 1053 function is  $-\frac{d^2}{d\lambda^2} \ln L(\lambda) = \frac{n}{\lambda^2}$  independent of the data  $\tau_i$ , as calculated  
 1054 previously. Therefore, the expectation  $\langle -\frac{d^2}{d\lambda^2} \ln L(\lambda) \rangle = \frac{n}{\lambda^2}$ , also know as the  
 1055 Fisher information).

1056 In conclusion, the analysis of the maximum and its vicinity of the likeli-  
 1057 hood using the empirical data gives the same information as the ensemble  
 1058 analysis of mean and variance of the estimator, just with small extra terms  
 1059 which vanish for large data sets. Already for 10 data points, (for instance  
 1060 using the Gaussian approximation), compared with  $p(\hat{\lambda}|\lambda)$  it can be quite  
 1061 good, and gives qualitatively the correct result for confidence interval analysis  
 1062 (see for another example [47] in Figure 2 b)), using extended simulations for  
 1063 the conditioned probability of estimators from the original parameter.
